# Supplementary material for: Environmental Enrichment Improved Learning and Memory, Increased Telencephalic Cell Proliferation, and Induced Differential Gene Expression in Colossoma macropomum
Source: Front Pharmacol. 2020 Jun 12;11:840. doi: 10.3389/fphar.2020.00840 (PMC7303308; doi:10.3389/fphar.2020.00840)
Supplement: Supplementary file 1 [file DataSheet_1.xlsx]

## Sheet: C.macropomum_64trans_DE
Transcript ID	Gene	Description	Length	#Hits	e-Value	sim mean	#GO	GO IDs	GO Names	Enzyme Codes	Enzyme Names	InterPro IDs	InterPro GO IDs	InterPro GO Names
TRINITY_DN10078_c0_g1_i3	SCY1	SCY1 - RecName: Full=N-terminal kinase-like protein; AltName: Full=SCY1-like protein 1	4427	20	0	56.36	18	F:GO:0003677; F:GO:0004713; F:GO:0005515; F:GO:0005524; C:GO:0005634; C:GO:0005793; C:GO:0005801; C:GO:0005813; C:GO:0005829; P:GO:0006890; P:GO:0006954; P:GO:0018108; P:GO:0021522; C:GO:0030126; P:GO:0034613; P:GO:0046907; P:GO:0048666; P:GO:0050794	F:DNA binding; F:protein tyrosine kinase activity; F:protein binding; F:ATP binding; C:nucleus; C:endoplasmic reticulum-Golgi intermediate compartment; C:cis-Golgi network; C:centrosome; C:cytosol; P:retrograde vesicle-mediated transport, Golgi to endoplasmic reticulum; P:inflammatory response; P:peptidyl-tyrosine phosphorylation; P:spinal cord motor neuron differentiation; C:COPI vesicle coat; P…	EC:2.7.10	Transferring phosphorus-containing groups	G3DSA:1.10.510.10 (GENE3D); IPR000719 (PFAM); G3DSA:3.30.200.20 (GENE3D); IPR011989 (G3DSA:1.25.10.GENE3D); mobidb-lite (MOBIDB_LITE); mobidb-lite (MOBIDB_LITE); mobidb-lite (MOBIDB_LITE); mobidb-lite (MOBIDB_LITE); mobidb-lite (MOBIDB_LITE); mobidb-lite (MOBIDB_LITE); mobidb-lite (MOBIDB_LITE); PTHR12984:SF3 (PANTHER); PTHR12984 (PANTHER); IPR000719 (PROSITE_PROFILES); IPR021133 (PROSITE_PROFILE…	F:GO:0004672; F:GO:0005524; P:GO:0006468	F:protein kinase activity; F:ATP binding; P:protein phosphorylation
TRINITY_DN10261_c0_g1_i14	MAPKBP1	MAPKBP1 - Pygocentrus nattereri mitogen-activated protein kinase binding protein 1 (mapkbp1), transcript variant X4, mRNA	7281	20	0	82.1	12	F:GO:0005515; C:GO:0005654; C:GO:0005730; C:GO:0005737; P:GO:0007052; P:GO:0007256; F:GO:0016301; P:GO:0022008; P:GO:0043124; C:GO:0097431; P:GO:1900425; P:GO:2000483	F:protein binding; C:nucleoplasm; C:nucleolus; C:cytoplasm; P:mitotic spindle organization; P:activation of JNKK activity; F:kinase activity; P:neurogenesis; P:negative regulation of I-kappaB kinase/NF-kappaB signaling; C:mitotic spindle pole; P:negative regulation of defense response to bacterium; P:negative regulation of interleukin-8 secretion			IPR001680 (SMART); IPR001680 (PFAM); IPR024977 (PFAM); IPR015943 (G3DSA:2.130.10.GENE3D); IPR015943 (G3DSA:2.130.10.GENE3D); IPR015943 (G3DSA:2.130.10.GENE3D); IPR015943 (G3DSA:2.130.10.GENE3D); mobidb-lite (MOBIDB_LITE); mobidb-lite (MOBIDB_LITE); mobidb-lite (MOBIDB_LITE); mobidb-lite (MOBIDB_LITE); mobidb-lite (MOBIDB_LITE); mobidb-lite (MOBIDB_LITE); mobidb-lite (MOBIDB_LITE); mobidb-lite (MO…	F:GO:0005515	F:protein binding
TRINITY_DN1069_c0_g1_i4	CTDSP2	CTDSP2 - carboxy-terminal domain RNA polymerase II polypeptide A small phosphatase 2-like	1089	8	0.0002595	55.01	4	C:GO:0005575; P:GO:0006357; F:GO:0008420; P:GO:0030182	C:cellular_component; P:regulation of transcription by RNA polymerase II; F:RNA polymerase II CTD heptapeptide repeat phosphatase activity; P:neuron differentiation			mobidb-lite (MOBIDB_LITE); mobidb-lite (MOBIDB_LITE)	no GO terms	no GO terms
TRINITY_DN10753_c0_g1_i1	CD46	CD46 - Pygocentrus nattereri membrane cofactor protein-like (LOC108425583), transcript variant X8, mRNA	862	20	2.30065e-133	83.53	2	C:GO:0005840; F:GO:0016787	C:ribosome; F:hydrolase activity			no IPS match	no IPS match	no IPS match
TRINITY_DN11534_c0_g1_i4	ECHS1	ECHS1 - RecName: Full=Enoyl-CoA hydratase, mitochondrial; AltName: Full=Enoyl-CoA hydratase 1; AltName: Full=Short-chain enoyl-CoA hydratase; Short=SCEH; Flags: Precursor	4247	20	0	62.47	20	F:GO:0003682; F:GO:0003714; F:GO:0004165; F:GO:0004300; F:GO:0004402; C:GO:0005694; C:GO:0005739; C:GO:0005782; C:GO:0005829; P:GO:0006625; P:GO:0007286; P:GO:0016573; C:GO:0016607; F:GO:0030674; P:GO:0033540; F:GO:0035064; P:GO:0060816; F:GO:0120092; P:GO:0120094; P:GO:1903507	F:chromatin binding; F:transcription corepressor activity; F:dodecenoyl-CoA delta-isomerase activity; F:enoyl-CoA hydratase activity; F:histone acetyltransferase activity; C:chromosome; C:mitochondrion; C:peroxisomal matrix; C:cytosol; P:protein targeting to peroxisome; P:spermatid development; P:histone acetylation; C:nuclear speck; F:protein binding, bridging; P:fatty acid beta-oxidation using …	EC:2.3.1.5; EC:2.3.1.48; EC:5.3.3.8	Arylamine N-acetyltransferase; Histone acetyltransferase; Delta(3)-Delta(2)-enoyl-CoA isomerase	IPR017984 (PRINTS); IPR000953 (SMART); IPR023780 (PFAM); G3DSA:3.90.226.10 (GENE3D); IPR001753 (PFAM); G3DSA:2.40.50.40 (GENE3D); mobidb-lite (MOBIDB_LITE); mobidb-lite (MOBIDB_LITE); mobidb-lite (MOBIDB_LITE); mobidb-lite (MOBIDB_LITE); PTHR43684 (PANTHER); PTHR43684:SF5 (PANTHER); IPR000953 (PROSITE_PROFILES); cd06558 (CDD); cd18634 (CDD); IPR029045 (SUPERFAMILY); IPR016197 (SUPERFAMILY)	F:GO:0003824	F:catalytic activity
TRINITY_DN11833_c0_g1_i1	PLCH1	PLCH1 - Astyanax mexicanus phospholipase C eta 1 (plch1), mRNA	749	20	1.4302e-141	75.28	11	F:GO:0004435; F:GO:0005507; F:GO:0005509; C:GO:0005886; F:GO:0008131; P:GO:0009308; P:GO:0016042; P:GO:0032959; P:GO:0048015; F:GO:0050429; P:GO:0051209	F:phosphatidylinositol phospholipase C activity; F:copper ion binding; F:calcium ion binding; C:plasma membrane; F:primary amine oxidase activity; P:amine metabolic process; P:lipid catabolic process; P:inositol trisphosphate biosynthetic process; P:phosphatidylinositol-mediated signaling; F:calcium-dependent phospholipase C activity; P:release of sequestered calcium ion into cytosol			no IPS match	no IPS match	no IPS match
TRINITY_DN1190_c0_g2_i7	UNKNOWN		951									no IPS match	no IPS match	no IPS match
TRINITY_DN11964_c0_g1_i1	FAM104A	FAM104A - Pygocentrus nattereri protein FAM104A-like (LOC108437143), mRNA	1860	20	0	77.32	3	F:GO:0005515; C:GO:0005575; P:GO:0008150	F:protein binding; C:cellular_component; P:biological_process			no IPS match	no IPS match	no IPS match
TRINITY_DN1429_c0_g1_i1	WNK4	WNK4 - RecName: Full=Serine/threonine-protein kinase WNK4; AltName: Full=Protein kinase lysine-deficient 4; AltName: Full=Protein kinase with no lysine 4	8016	20	0	80.06	54	P:GO:0000122; F:GO:0000287; P:GO:0003084; F:GO:0004674; F:GO:0005524; C:GO:0005623; C:GO:0005634; C:GO:0005829; C:GO:0005886; C:GO:0005912; C:GO:0005923; P:GO:0006821; P:GO:0008285; P:GO:0009911; P:GO:0010766; P:GO:0010800; P:GO:0010820; P:GO:0010923; P:GO:0018105; F:GO:0019869; F:GO:0019870; F:GO:0019901; F:GO:0019902; P:GO:0023016; F:GO:0030291; F:GO:0030295; P:GO:0030644; P:GO:0032147; P:GO:00…	P:negative regulation of transcription by RNA polymerase II; F:magnesium ion binding; P:positive regulation of systemic arterial blood pressure; F:protein serine/threonine kinase activity; F:ATP binding; C:cell; C:nucleus; C:cytosol; C:plasma membrane; C:adherens junction; C:bicellular tight junction; P:chloride transport; P:negative regulation of cell population proliferation; P:positive regulat…	EC:2.7.11	Transferring phosphorus-containing groups	IPR000719 (SMART); G3DSA:3.30.200.20 (GENE3D); IPR000719 (PFAM); G3DSA:1.10.510.10 (GENE3D); G3DSA:3.10.20.90 (GENE3D); IPR024678 (PFAM); mobidb-lite (MOBIDB_LITE); mobidb-lite (MOBIDB_LITE); mobidb-lite (MOBIDB_LITE); mobidb-lite (MOBIDB_LITE); mobidb-lite (MOBIDB_LITE); mobidb-lite (MOBIDB_LITE); mobidb-lite (MOBIDB_LITE); mobidb-lite (MOBIDB_LITE); mobidb-lite (MOBIDB_LITE); mobidb-lite (MOBID…	F:GO:0004672; F:GO:0004674; F:GO:0005524; P:GO:0006468	F:protein kinase activity; F:protein serine/threonine kinase activity; F:ATP binding; P:protein phosphorylation
TRINITY_DN14371_c0_g3_i2	KAP114	KAP114 - RecName: Full=Importin subunit beta-5; AltName: Full=114 kDa karyopherin; AltName: Full=Karyopherin subunit beta-5; AltName: Full=Karyopherin-114	4226	4	0	70.67	8	C:GO:0005635; C:GO:0005829; P:GO:0006606; F:GO:0008536; P:GO:0042254; F:GO:0042393; P:GO:0050821; F:GO:0061608	C:nuclear envelope; C:cytosol; P:protein import into nucleus; F:Ran GTPase binding; P:ribosome biogenesis; F:histone binding; P:protein stabilization; F:nuclear import signal receptor activity			IPR001494 (SMART); IPR001494 (PFAM); mobidb-lite (MOBIDB_LITE); mobidb-lite (MOBIDB_LITE); PTHR10997 (PANTHER); PTHR10997:SF9 (PANTHER); IPR001494 (PROSITE_PROFILES); IPR016024 (SUPERFAMILY)	P:GO:0006886; F:GO:0008536	P:intracellular protein transport; F:Ran GTPase binding
TRINITY_DN14489_c0_g1_i4	UNKNOWN		612									no IPS match	no IPS match	no IPS match
TRINITY_DN149_c0_g1_i7	VSNL1	VSNL1 - visinin-like protein 1	2866	20	2.22134e-130	99.01	2	F:GO:0005509; C:GO:0005575	F:calcium ion binding; C:cellular_component			PR00450 (PRINTS); IPR002048 (SMART); G3DSA:1.10.238.10 (GENE3D); IPR002048 (PFAM); IPR002048 (PFAM); IPR029533 (PTHR23055:PANTHER); IPR028846 (PANTHER); IPR002048 (PROSITE_PROFILES); IPR002048 (PROSITE_PROFILES); IPR002048 (PROSITE_PROFILES); IPR002048 (PROSITE_PROFILES); IPR002048 (CDD); IPR002048 (CDD); IPR011992 (SUPERFAMILY)	F:GO:0005509	F:calcium ion binding
TRINITY_DN15121_c0_g1_i3	UTP6	UTP6 - Pygocentrus nattereri UTP6, small subunit processome component (utp6), mRNA	1173	20	0	86.82	4	P:GO:0000462; F:GO:0030515; C:GO:0032040; C:GO:0034388	P:maturation of SSU-rRNA from tricistronic rRNA transcript (SSU-rRNA, 5.8S rRNA, LSU-rRNA); F:snoRNA binding; C:small-subunit processome; C:Pwp2p-containing subcomplex of 90S preribosome			no IPS match	no IPS match	no IPS match
TRINITY_DN15301_c0_g1_i4	RBM4B	RBM4B - Pygocentrus nattereri RNA-binding protein 4B-like (LOC108428046), transcript variant X3, mRNA	3407	20	0	84.46	13	P:GO:0000381; F:GO:0003729; F:GO:0005515; C:GO:0005730; C:GO:0005829; P:GO:0006417; F:GO:0008270; P:GO:0010628; C:GO:0016607; P:GO:0032922; C:GO:0032991; P:GO:0043153; P:GO:0045292	P:regulation of alternative mRNA splicing, via spliceosome; F:mRNA binding; F:protein binding; C:nucleolus; C:cytosol; P:regulation of translation; F:zinc ion binding; P:positive regulation of gene expression; C:nuclear speck; P:circadian regulation of gene expression; C:protein-containing complex; P:entrainment of circadian clock by photoperiod; P:mRNA cis splicing, via spliceosome			no IPS match	no IPS match	no IPS match
TRINITY_DN153536_c0_g1_i1	RPL24	RPL24 - Pygocentrus nattereri ribosomal protein L24 (rpl24), mRNA	361	17	1.64702e-16	85.52	8	P:GO:0000027; F:GO:0003723; F:GO:0003735; P:GO:0006412; F:GO:0016787; C:GO:0022625; P:GO:0043009; P:GO:1902626	P:ribosomal large subunit assembly; F:RNA binding; F:structural constituent of ribosome; P:translation; F:hydrolase activity; C:cytosolic large ribosomal subunit; P:chordate embryonic development; P:assembly of large subunit precursor of preribosome			PS51257 (PROSITE_PROFILES)	no GO terms	no GO terms
TRINITY_DN15811_c0_g1_i1	RBMS3	RBMS3 - Astyanax mexicanus RNA-binding motif, single-stranded-interacting protein 3-like (LOC103033149), transcript variant X1, mRNA	1448	20	0	78.86	4	F:GO:0003723; P:GO:0017015; P:GO:0061035; C:GO:1990904	F:RNA binding; P:regulation of transforming growth factor beta receptor signaling pathway; P:regulation of cartilage development; C:ribonucleoprotein complex			IPR002343 (PRINTS); IPR000504 (SMART); IPR000504 (PFAM); IPR012677 (G3DSA:3.30.70.GENE3D); IPR012677 (G3DSA:3.30.70.GENE3D); mobidb-lite (MOBIDB_LITE); PTHR24012:SF742 (PANTHER); PTHR24012 (PANTHER); IPR000504 (PROSITE_PROFILES); IPR000504 (PROSITE_PROFILES); IPR035979 (SUPERFAMILY); IPR035979 (SUPERFAMILY)	F:GO:0003676; F:GO:0003723; C:GO:1990904	F:nucleic acid binding; F:RNA binding; C:ribonucleoprotein complex
TRINITY_DN16731_c0_g1_i4	odhA	odhA - RecName: Full=2-oxoglutarate dehydrogenase E1 component; AltName: Full=Alpha-ketoglutarate dehydrogenase	4894	20	0	66.52	8	P:GO:0002244; F:GO:0004591; C:GO:0005759; C:GO:0005829; P:GO:0006096; P:GO:0006099; F:GO:0030976; C:GO:0045252	P:hematopoietic progenitor cell differentiation; F:oxoglutarate dehydrogenase (succinyl-transferring) activity; C:mitochondrial matrix; C:cytosol; P:glycolytic process; P:tricarboxylic acid cycle; F:thiamine pyrophosphate binding; C:oxoglutarate dehydrogenase complex	EC:1.2.4.2	Oxoglutarate dehydrogenase (succinyl-transferring)	IPR005475 (SMART); G3DSA:3.40.50.12470 (GENE3D); G3DSA:3.40.50.970 (GENE3D); IPR005475 (PFAM); IPR031717 (PFAM); IPR001017 (PFAM); IPR042179 (G3DSA:3.40.50.GENE3D); PTHR23152:SF21 (PANTHER); IPR011603 (PANTHER); IPR029061 (SUPERFAMILY); IPR029061 (SUPERFAMILY)	F:GO:0004591; P:GO:0006099; F:GO:0016624; F:GO:0030976; P:GO:0055114	F:oxoglutarate dehydrogenase (succinyl-transferring) activity; P:tricarboxylic acid cycle; F:oxidoreductase activity, acting on the aldehyde or oxo group of donors, disulfide as acceptor; F:thiamine pyrophosphate binding; P:oxidation-reduction process
TRINITY_DN16731_c0_g1_i5	odhA	odhA - RecName: Full=2-oxoglutarate dehydrogenase E1 component; AltName: Full=Alpha-ketoglutarate dehydrogenase	4951	20	0	68.02	8	P:GO:0002244; F:GO:0004591; C:GO:0005759; C:GO:0005829; P:GO:0006096; P:GO:0006099; F:GO:0030976; C:GO:0045252	P:hematopoietic progenitor cell differentiation; F:oxoglutarate dehydrogenase (succinyl-transferring) activity; C:mitochondrial matrix; C:cytosol; P:glycolytic process; P:tricarboxylic acid cycle; F:thiamine pyrophosphate binding; C:oxoglutarate dehydrogenase complex	EC:1.2.4.2	Oxoglutarate dehydrogenase (succinyl-transferring)	IPR005475 (SMART); IPR042179 (G3DSA:3.40.50.GENE3D); IPR005475 (PFAM); IPR031717 (PFAM); IPR001017 (PFAM); G3DSA:3.40.50.970 (GENE3D); G3DSA:3.40.50.12470 (GENE3D); IPR011603 (PANTHER); PTHR23152:SF21 (PANTHER); IPR029061 (SUPERFAMILY); IPR029061 (SUPERFAMILY)	F:GO:0004591; P:GO:0006099; F:GO:0016624; F:GO:0030976; P:GO:0055114	F:oxoglutarate dehydrogenase (succinyl-transferring) activity; P:tricarboxylic acid cycle; F:oxidoreductase activity, acting on the aldehyde or oxo group of donors, disulfide as acceptor; F:thiamine pyrophosphate binding; P:oxidation-reduction process
TRINITY_DN18392_c0_g3_i2	LIG3	LIG3 - Pygocentrus nattereri DNA ligase 3 (lig3), transcript variant X1, mRNA	5141	18	0	83.79	12	F:GO:0003677; F:GO:0003910; F:GO:0005524; C:GO:0005739; P:GO:0006273; P:GO:0006288; P:GO:0006310; F:GO:0008270; P:GO:0043504; C:GO:0070421; P:GO:0071897; P:GO:0097681	F:DNA binding; F:DNA ligase (ATP) activity; F:ATP binding; C:mitochondrion; P:lagging strand elongation; P:base-excision repair, DNA ligation; P:DNA recombination; F:zinc ion binding; P:mitochondrial DNA repair; C:DNA ligase III-XRCC1 complex; P:DNA biosynthetic process; P:double-strand break repair via alternative nonhomologous end joining			IPR001510 (SMART); G3DSA:2.40.50.140 (GENE3D); IPR031916 (PFAM); G3DSA:3.30.1490.70 (GENE3D); IPR012310 (PFAM); IPR036420 (G3DSA:3.40.50.GENE3D); IPR012308 (PFAM); IPR012309 (PFAM); IPR036957 (G3DSA:3.30.1740.GENE3D); IPR001510 (PFAM); G3DSA:3.30.470.30 (GENE3D); IPR000977 (TIGRFAM); IPR036599 (G3DSA:1.10.3260.GENE3D); mobidb-lite (MOBIDB_LITE); mobidb-lite (MOBIDB_LITE); mobidb-lite (MOBIDB_LITE…	F:GO:0003677; F:GO:0003910; F:GO:0005524; P:GO:0006281; P:GO:0006310; F:GO:0008270; P:GO:0071897	F:DNA binding; F:DNA ligase (ATP) activity; F:ATP binding; P:DNA repair; P:DNA recombination; F:zinc ion binding; P:DNA biosynthetic process
TRINITY_DN1866_c0_g1_i11	PPP4R4	PPP4R4 - Pygocentrus nattereri protein phosphatase 4 regulatory subunit 4 (ppp4r4), transcript variant X4, mRNA	5988	20	0	87.8	5	C:GO:0005829; C:GO:0008287; F:GO:0019888; P:GO:0032515; P:GO:0080163	C:cytosol; C:protein serine/threonine phosphatase complex; F:protein phosphatase regulator activity; P:negative regulation of phosphoprotein phosphatase activity; P:regulation of protein serine/threonine phosphatase activity			IPR011989 (G3DSA:1.25.10.GENE3D); mobidb-lite (MOBIDB_LITE); mobidb-lite (MOBIDB_LITE); mobidb-lite (MOBIDB_LITE); mobidb-lite (MOBIDB_LITE); mobidb-lite (MOBIDB_LITE); mobidb-lite (MOBIDB_LITE); mobidb-lite (MOBIDB_LITE); IPR039918 (PANTHER); IPR021133 (PROSITE_PROFILES); IPR021133 (PROSITE_PROFILES); IPR016024 (SUPERFAMILY)	no GO terms	no GO terms
TRINITY_DN191_c1_g1_i1	PPP3R1	PPP3R1 - RecName: Full=Calcineurin subunit B; AltName: Full=Calcineurin regulatory subunit; AltName: Full=Protein phosphatase 2B regulatory subunit	1960	20	1.8685e-82	84.35	72	C:GO:0000139; P:GO:0000754; P:GO:0001569; P:GO:0001578; P:GO:0001837; F:GO:0005509; F:GO:0005516; C:GO:0005623; C:GO:0005654; C:GO:0005739; C:GO:0005783; C:GO:0005829; C:GO:0005955; P:GO:0005977; P:GO:0006402; P:GO:0006469; P:GO:0006606; P:GO:0006611; P:GO:0006873; P:GO:0006952; P:GO:0007223; P:GO:0007269; P:GO:0007321; P:GO:0007507; F:GO:0008017; C:GO:0008021; F:GO:0008597; P:GO:0009405; C:GO:00…	C:Golgi membrane; P:adaptation of signaling pathway by response to pheromone involved in conjugation with cellular fusion; P:branching involved in blood vessel morphogenesis; P:microtubule bundle formation; P:epithelial to mesenchymal transition; F:calcium ion binding; F:calmodulin binding; C:cell; C:nucleoplasm; C:mitochondrion; C:endoplasmic reticulum; C:cytosol; C:calcineurin complex; P:glycog…	EC:3.1.3.16	Protein-serine/threonine phosphatase	PR01697 (PRINTS); IPR002048 (SMART); IPR002048 (PFAM); G3DSA:1.10.238.10 (GENE3D); IPR002048 (PFAM); PTHR45942:SF3 (PANTHER); PTHR45942 (PANTHER); IPR002048 (PROSITE_PROFILES); IPR002048 (PROSITE_PROFILES); IPR002048 (PROSITE_PROFILES); IPR002048 (CDD); IPR011992 (SUPERFAMILY)	F:GO:0005509	F:calcium ion binding
TRINITY_DN19124_c1_g1_i1	CHST11	CHST11 - Pygocentrus nattereri carbohydrate (chondroitin 4) sulfotransferase 11 (chst11), transcript variant X2, mRNA	666	20	3.88825e-15	79.59	7	C:GO:0000139; P:GO:0007517; P:GO:0008045; C:GO:0016021; P:GO:0016051; P:GO:0030206; F:GO:0047756	C:Golgi membrane; P:muscle organ development; P:motor neuron axon guidance; C:integral component of membrane; P:carbohydrate biosynthetic process; P:chondroitin sulfate biosynthetic process; F:chondroitin 4-sulfotransferase activity			no IPS match	no IPS match	no IPS match
TRINITY_DN19965_c0_g1_i6	TMEM243	TMEM243 - Pygocentrus nattereri transmembrane protein 243 (tmem243), transcript variant X1, mRNA	1438	20	0	78.38	3	F:GO:0003674; P:GO:0008150; C:GO:0016021	F:molecular_function; P:biological_process; C:integral component of membrane			IPR022564 (PFAM); IPR022564 (PANTHER); PD456474 (PRODOM)	no GO terms	no GO terms
TRINITY_DN20461_c0_g1_i5	NTM	NTM - Pygocentrus nattereri neurotrimin-like (LOC108423783), transcript variant X3, mRNA	2805	20	0	84.99	11	C:GO:0005634; C:GO:0005737; P:GO:0007051; P:GO:0007059; P:GO:0018013; P:GO:0018016; P:GO:0035572; P:GO:0035573; F:GO:0042054; F:GO:0042802; F:GO:0071885	C:nucleus; C:cytoplasm; P:spindle organization; P:chromosome segregation; P:N-terminal peptidyl-glycine methylation; P:N-terminal peptidyl-proline dimethylation; P:N-terminal peptidyl-serine dimethylation; P:N-terminal peptidyl-serine trimethylation; F:histone methyltransferase activity; F:identical protein binding; F:N-terminal protein N-methyltransferase activity			IPR003599 (SMART); IPR003598 (SMART); PIRSF000615 (PIRSF); IPR013106 (PFAM); IPR013783 (G3DSA:2.60.40.GENE3D); PF13927 (PFAM); IPR013783 (G3DSA:2.60.40.GENE3D); IPR013783 (G3DSA:2.60.40.GENE3D); PTHR42757 (PANTHER); PTHR42757:SF36 (PANTHER); IPR007110 (PROSITE_PROFILES); IPR007110 (PROSITE_PROFILES); IPR007110 (PROSITE_PROFILES); cd00096 (CDD); IPR036179 (SUPERFAMILY); IPR036179 (SUPERFAMILY); IP…	no GO terms	no GO terms
TRINITY_DN21448_c0_g1_i1	MDGA2	MDGA2 - Pygocentrus nattereri MAM domain-containing glycosylphosphatidylinositol anchor protein 2-like (LOC108411484), transcript variant X2, mRNA	1483	20	0	78.51	4	C:GO:0016020; P:GO:0021611; P:GO:0021731; P:GO:1905483	C:membrane; P:facial nerve formation; P:trigeminal motor nucleus development; P:regulation of motor neuron migration			no IPS match	no IPS match	no IPS match
TRINITY_DN24039_c0_g1_i2	SSPO	SSPO - RecName: Full=SCO-spondin; Flags: Precursor	7614	20	0	53.78	29	F:GO:0002020; P:GO:0002376; P:GO:0002576; F:GO:0005178; F:GO:0005518; C:GO:0005615; C:GO:0005783; P:GO:0007165; P:GO:0007597; P:GO:0009605; P:GO:0009719; C:GO:0016020; F:GO:0019865; P:GO:0022600; P:GO:0030154; P:GO:0030168; P:GO:0030198; P:GO:0031589; C:GO:0033093; P:GO:0033993; P:GO:0042592; F:GO:0042803; F:GO:0047485; P:GO:0048523; P:GO:0048731; F:GO:0051087; P:GO:0051260; C:GO:0062023; C:GO:00…	F:protease binding; P:immune system process; P:platelet degranulation; F:integrin binding; F:collagen binding; C:extracellular space; C:endoplasmic reticulum; P:signal transduction; P:blood coagulation, intrinsic pathway; P:response to external stimulus; P:response to endogenous stimulus; C:membrane; F:immunoglobulin binding; P:digestive system process; P:cell differentiation; P:platelet activati…			IPR001846 (SMART); IPR014853 (SMART); IPR006207 (SMART); IPR001007 (SMART); IPR002035 (SMART); IPR036465 (G3DSA:3.40.50.GENE3D); IPR014853 (PFAM); G3DSA:2.10.25.10 (GENE3D); IPR036465 (G3DSA:3.40.50.GENE3D); IPR002919 (PFAM); IPR002035 (PFAM); IPR001846 (PFAM); IPR036465 (G3DSA:3.40.50.GENE3D); mobidb-lite (MOBIDB_LITE); mobidb-lite (MOBIDB_LITE); PTHR11339 (PANTHER); IPR037578 (PTHR11339:PANTHER…	F:GO:0005515	F:protein binding
TRINITY_DN25318_c0_g1_i1	NEUROD1	NEUROD1 - Pygocentrus nattereri neuronal differentiation 1 (neurod1), transcript variant X2, mRNA	237	3	1.71709e-64	91.53	11	F:GO:0003677; C:GO:0005634; C:GO:0005737; P:GO:0006355; P:GO:0031018; P:GO:0031099; P:GO:0042051; P:GO:0045746; F:GO:0046983; P:GO:0048923; P:GO:0060119	F:DNA binding; C:nucleus; C:cytoplasm; P:regulation of transcription, DNA-templated; P:endocrine pancreas development; P:regeneration; P:compound eye photoreceptor development; P:negative regulation of Notch signaling pathway; F:protein dimerization activity; P:posterior lateral line neuromast hair cell differentiation; P:inner ear receptor cell development			no IPS match	no IPS match	no IPS match
TRINITY_DN2649_c0_g1_i19	CAPS-1	CAPS-1 - RecName: Full=Calcium-dependent secretion activator 1; AltName: Full=Calcium-dependent activator protein for secretion 1; Short=CAPS-1	5234	9	0	81.92	33	P:GO:0001820; F:GO:0005509; F:GO:0005546; C:GO:0005654; C:GO:0005829; P:GO:0006937; P:GO:0007419; P:GO:0007635; C:GO:0008021; P:GO:0009267; P:GO:0015031; P:GO:0016050; P:GO:0016082; P:GO:0018991; F:GO:0019901; C:GO:0030054; C:GO:0030424; P:GO:0030536; P:GO:0035249; C:GO:0042734; C:GO:0043025; C:GO:0045211; P:GO:0045956; P:GO:0050432; P:GO:0071244; P:GO:0090325; C:GO:0098674; C:GO:0098688; C:GO:00…	P:serotonin secretion; F:calcium ion binding; F:phosphatidylinositol-4,5-bisphosphate binding; C:nucleoplasm; C:cytosol; P:regulation of muscle contraction; P:ventral cord development; P:chemosensory behavior; C:synaptic vesicle; P:cellular response to starvation; P:protein transport; P:vesicle organization; P:synaptic vesicle priming; P:oviposition; F:protein kinase binding; C:cell junction; C:a…			IPR001849 (SMART); IPR010439 (SMART); IPR011993 (G3DSA:2.30.29.GENE3D); IPR010439 (PFAM); IPR001849 (PFAM); mobidb-lite (MOBIDB_LITE); mobidb-lite (MOBIDB_LITE); mobidb-lite (MOBIDB_LITE); PTHR12166:SF4 (PANTHER); IPR033227 (PANTHER); IPR014770 (PROSITE_PROFILES); IPR001849 (PROSITE_PROFILES); cd01234 (CDD); SSF50729 (SUPERFAMILY)	P:GO:0016079; P:GO:1990504	P:synaptic vesicle exocytosis; P:dense core granule exocytosis
TRINITY_DN26984_c0_g1_i4	RALY	RALY - Pygocentrus nattereri RALY heterogeneous nuclear ribonucleoprotein (raly), transcript variant X2, mRNA	1487	20	0	82.64	2	F:GO:0003723; C:GO:0005634	F:RNA binding; C:nucleus			IPR000504 (SMART); IPR017347 (PIRSF); IPR012677 (G3DSA:3.30.70.GENE3D); IPR000504 (PFAM); mobidb-lite (MOBIDB_LITE); mobidb-lite (MOBIDB_LITE); PTHR13968 (PANTHER); PTHR13968:SF6 (PANTHER); IPR000504 (PROSITE_PROFILES); IPR034502 (CDD); IPR035979 (SUPERFAMILY)	F:GO:0003676	F:nucleic acid binding
TRINITY_DN28163_c0_g1_i1	UNKNOWN		1732									mobidb-lite (MOBIDB_LITE); mobidb-lite (MOBIDB_LITE); mobidb-lite (MOBIDB_LITE); mobidb-lite (MOBIDB_LITE); IPR013087 (PROSITE_PROFILES); cd16855 (CDD)	F:GO:0003676	F:nucleic acid binding
TRINITY_DN2832_c0_g1_i6	ARGLU1	ARGLU1- Astyanax mexicanus arginine and glutamate-rich protein 1-B (LOC103029609), transcript variant X2, misc_RNA	2023	19	2.06536e-138	88.44	4	F:GO:0003674; C:GO:0005654; C:GO:0005739; P:GO:0008150	F:molecular_function; C:nucleoplasm; C:mitochondrion; P:biological_process			no IPS match	no IPS match	no IPS match
TRINITY_DN28535_c0_g1_i10	GLRX	GLRX - RecName: Full=Glutaredoxin-1; AltName: Full=Thioltransferase-1; Short=TTase-1	3411	13	3.34843e-06	56.52	5	C:GO:0005575; F:GO:0009055; F:GO:0015035; F:GO:0016740; P:GO:0045454	C:cellular_component; F:electron transfer activity; F:protein disulfide oxidoreductase activity; F:transferase activity; P:cell redox homeostasis			IPR014025 (PRINTS); IPR036249 (G3DSA:3.40.30.GENE3D); IPR002109 (PFAM); mobidb-lite (MOBIDB_LITE); PTHR46361 (PANTHER); PTHR46361:SF5 (PANTHER); IPR002109 (PROSITE_PROFILES); cd04371 (CDD); IPR036249 (SUPERFAMILY)	F:GO:0009055; F:GO:0015035; P:GO:0045454	F:electron transfer activity; F:protein disulfide oxidoreductase activity; P:cell redox homeostasis
TRINITY_DN297_c1_g1_i6	TAP2	TAP2 - antigen peptide transporter 2-like	2689	20	0	86.47	13	F:GO:0005524; C:GO:0005765; F:GO:0015433; P:GO:0015833; F:GO:0016887; P:GO:0019885; F:GO:0042288; C:GO:0042825; P:GO:0046686; F:GO:0046978; F:GO:0046979; P:GO:0051597; P:GO:0055085	F:ATP binding; C:lysosomal membrane; F:ATPase-coupled peptide antigen transmembrane transporter activity; P:peptide transport; F:ATPase activity; P:antigen processing and presentation of endogenous peptide antigen via MHC class I; F:MHC class I protein binding; C:TAP complex; P:response to cadmium ion; F:TAP1 binding; F:TAP2 binding; P:response to methylmercury; P:transmembrane transport	EC:3.6.1.3; EC:7.4.2.5; EC:3.6.1.15	Adenosinetriphosphatase; n/a; Nucleoside-triphosphate phosphatase	IPR003593 (SMART); IPR011527 (PFAM); G3DSA:3.40.50.300 (GENE3D); IPR036640 (G3DSA:1.20.1560.GENE3D); PIRSF002773 (PIRSF); IPR003439 (PFAM); PTHR24221:SF273 (PANTHER); IPR039421 (PANTHER); IPR011527 (PROSITE_PROFILES); IPR003439 (PROSITE_PROFILES); cd18590 (CDD); IPR036640 (SUPERFAMILY); IPR027417 (SUPERFAMILY)	F:GO:0005524; C:GO:0016021; F:GO:0016887; F:GO:0042626; P:GO:0055085	F:ATP binding; C:integral component of membrane; F:ATPase activity; F:ATPase-coupled transmembrane transporter activity; P:transmembrane transport
TRINITY_DN3096_c0_g1_i3	ATP5MG	ATP5M - RecName: Full=ATP synthase subunit g, mitochondrial; Short=ATPase subunit g; AltName: Full=ATP synthase membrane subunit g	604	6	8.68541e-28	80.5	10	C:GO:0000276; P:GO:0001666; F:GO:0005515; F:GO:0008289; F:GO:0008553; C:GO:0016021; F:GO:0016887; P:GO:0042407; P:GO:0042776; F:GO:0046933	C:mitochondrial proton-transporting ATP synthase complex, coupling factor F(o); P:response to hypoxia; F:protein binding; F:lipid binding; F:proton-exporting ATPase activity, phosphorylative mechanism; C:integral component of membrane; F:ATPase activity; P:cristae formation; P:mitochondrial ATP synthesis coupled proton transport; F:proton-transporting ATP synthase activity, rotational mechanism	EC:7.1.3.1; EC:3.6.1.3; EC:7.1.2.1; EC:3.6.1.15	n/a; Adenosinetriphosphatase; n/a; Nucleoside-triphosphate phosphatase	IPR006808 (PFAM); IPR006808 (PANTHER); PTHR12386:SF30 (PANTHER)	C:GO:0000276; F:GO:0015078; P:GO:0015986	C:mitochondrial proton-transporting ATP synthase complex, coupling factor F(o); F:proton transmembrane transporter activity; P:ATP synthesis coupled proton transport
TRINITY_DN311_c0_g1_i4	H1-1	H1-1 - Pygocentrus nattereri histone H1-like (LOC108434264), mRNA	2763	20	0	81.93	6	C:GO:0000786; F:GO:0003677; C:GO:0005576; C:GO:0005634; P:GO:0006334; P:GO:0042742	C:nucleosome; F:DNA binding; C:extracellular region; C:nucleus; P:nucleosome assembly; P:defense response to bacterium			IPR005819 (PRINTS); IPR005818 (SMART); IPR005818 (PFAM); IPR036388 (G3DSA:1.10.10.GENE3D); mobidb-lite (MOBIDB_LITE); mobidb-lite (MOBIDB_LITE); mobidb-lite (MOBIDB_LITE); PTHR11467:SF20 (PANTHER); PTHR11467 (PANTHER); IPR005818 (PROSITE_PROFILES); IPR005818 (CDD); IPR036390 (SUPERFAMILY)	C:GO:0000786; F:GO:0003677; P:GO:0006334; C:GO:0042025	C:nucleosome; F:DNA binding; P:nucleosome assembly; C:host cell nucleus
TRINITY_DN316_c0_g1_i1	PPP2R1B	PPP2R1B - RecName: Full=Serine/threonine-protein phosphatase 2A 65 kDa regulatory subunit A beta isoform; AltName: Full=PP2A subunit A isoform PR65-beta; AltName: Full=PP2A subunit A isoform R1-beta	2252	19	0	76.3	65	C:GO:0000159; P:GO:0000184; P:GO:0000188; C:GO:0000775; C:GO:0005618; C:GO:0005635; C:GO:0005654; C:GO:0005739; C:GO:0005813; C:GO:0005814; C:GO:0005826; C:GO:0005829; C:GO:0005934; C:GO:0005935; P:GO:0006275; P:GO:0006355; P:GO:0006417; P:GO:0006672; P:GO:0006914; P:GO:0007084; P:GO:0007094; P:GO:0007099; P:GO:0007143; P:GO:0007623; P:GO:0008380; P:GO:0009792; P:GO:0009926; P:GO:0010389; C:GO:00…	C:protein phosphatase type 2A complex; P:nuclear-transcribed mRNA catabolic process, nonsense-mediated decay; P:inactivation of MAPK activity; C:chromosome, centromeric region; C:cell wall; C:nuclear envelope; C:nucleoplasm; C:mitochondrion; C:centrosome; C:centriole; C:actomyosin contractile ring; C:cytosol; C:cellular bud tip; C:cellular bud neck; P:regulation of DNA replication; P:regulation o…	EC:3.1.3.16	Protein-serine/threonine phosphatase	IPR000357 (PFAM); PF13646 (PFAM); IPR011989 (G3DSA:1.25.10.GENE3D); PTHR10648 (PANTHER); PTHR10648:SF9 (PANTHER); IPR021133 (PROSITE_PROFILES); IPR021133 (PROSITE_PROFILES); IPR021133 (PROSITE_PROFILES); IPR021133 (PROSITE_PROFILES); IPR021133 (PROSITE_PROFILES); IPR021133 (PROSITE_PROFILES); IPR021133 (PROSITE_PROFILES); IPR021133 (PROSITE_PROFILES); IPR021133 (PROSITE_PROFILES); IPR021133 (PROS…	F:GO:0005515	F:protein binding
TRINITY_DN3228_c0_g1_i3	AIF1L	AIF1L - RecName: Full=Allograft inflammatory factor 1-like; AltName: Full=Ionized calcium-binding adapter molecule 2 [Mus musculus]	2629	18	1.68905e-70	74.35	44	P:GO:0001774; C:GO:0001891; P:GO:0001934; F:GO:0005509; C:GO:0005634; C:GO:0005829; C:GO:0005884; C:GO:0005925; P:GO:0006911; P:GO:0010629; P:GO:0014739; P:GO:0016601; P:GO:0021549; C:GO:0030027; P:GO:0030041; P:GO:0030046; P:GO:0031668; C:GO:0032587; P:GO:0032870; C:GO:0032991; P:GO:0042102; P:GO:0043066; C:GO:0043204; P:GO:0045429; C:GO:0048471; P:GO:0048661; P:GO:0048662; P:GO:0048678; F:GO:00…	P:microglial cell activation; C:phagocytic cup; P:positive regulation of protein phosphorylation; F:calcium ion binding; C:nucleus; C:cytosol; C:actin filament; C:focal adhesion; P:phagocytosis, engulfment; P:negative regulation of gene expression; P:positive regulation of muscle hyperplasia; P:Rac protein signal transduction; P:cerebellum development; C:lamellipodium; P:actin filament polymeriza…			G3DSA:1.10.238.10 (GENE3D); mobidb-lite (MOBIDB_LITE); IPR042433 (PANTHER); IPR028453 (PTHR10356:PANTHER); IPR002048 (PROSITE_PROFILES); IPR011992 (SUPERFAMILY)	F:GO:0005509; F:GO:0051015	F:calcium ion binding; F:actin filament binding
TRINITY_DN3228_c0_g1_i4	AIF1L	AIF1L - Full=Allograft inflammatory factor 1-like; AltName: Full=Ionized calcium-binding adapter molecule 2 [Mus musculus]	2652	18	1.83505e-70	74.35	44	P:GO:0001774; C:GO:0001891; P:GO:0001934; F:GO:0005509; C:GO:0005634; C:GO:0005829; C:GO:0005884; C:GO:0005925; P:GO:0006911; P:GO:0010629; P:GO:0014739; P:GO:0016601; P:GO:0021549; C:GO:0030027; P:GO:0030041; P:GO:0030046; P:GO:0031668; C:GO:0032587; P:GO:0032870; C:GO:0032991; P:GO:0042102; P:GO:0043066; C:GO:0043204; P:GO:0045429; C:GO:0048471; P:GO:0048661; P:GO:0048662; P:GO:0048678; F:GO:00…	P:microglial cell activation; C:phagocytic cup; P:positive regulation of protein phosphorylation; F:calcium ion binding; C:nucleus; C:cytosol; C:actin filament; C:focal adhesion; P:phagocytosis, engulfment; P:negative regulation of gene expression; P:positive regulation of muscle hyperplasia; P:Rac protein signal transduction; P:cerebellum development; C:lamellipodium; P:actin filament polymeriza…			IPR002048 (PROSITE_PROFILES); IPR011992 (SUPERFAMILY); IPR028453 (PTHR10356:PANTHER); IPR042433 (PANTHER); G3DSA:1.10.238.10 (GENE3D); mobidb-lite (MOBIDB_LITE)	F:GO:0005509; F:GO:0051015	F:calcium ion binding; F:actin filament binding
TRINITY_DN3352_c0_g1_i1	INSYN1	INSYN1 - RecName: Full=Inhibitory synaptic factor 1; Short=InSyn1	2977	8	1.01278e-104	61.91	5	F:GO:0005515; C:GO:0014069; C:GO:0030054; C:GO:0045211; P:GO:0060080	F:protein binding; C:postsynaptic density; C:cell junction; C:postsynaptic membrane; P:inhibitory postsynaptic potential			IPR027997 (PFAM); mobidb-lite (MOBIDB_LITE); mobidb-lite (MOBIDB_LITE); mobidb-lite (MOBIDB_LITE); mobidb-lite (MOBIDB_LITE); mobidb-lite (MOBIDB_LITE); mobidb-lite (MOBIDB_LITE); mobidb-lite (MOBIDB_LITE); mobidb-lite (MOBIDB_LITE); mobidb-lite (MOBIDB_LITE); PTHR15917:SF3 (PANTHER); IPR027997 (PANTHER)	no GO terms	no GO terms
TRINITY_DN3522_c0_g1_i3	SAPCD1	SAPCD1 - RecName: Full=Suppressor APC domain-containing protein 1; AltName: Full=Protein G7d	3008	4	1.60228e-40	62.35	12	P:GO:0000132; F:GO:0005515; C:GO:0005654; C:GO:0005730; C:GO:0005829; P:GO:0008284; C:GO:0016020; C:GO:0043296; C:GO:0045179; P:GO:0090175; P:GO:0098725; P:GO:1904777	P:establishment of mitotic spindle orientation; F:protein binding; C:nucleoplasm; C:nucleolus; C:cytosol; P:positive regulation of cell population proliferation; C:membrane; C:apical junction complex; C:apical cortex; P:regulation of establishment of planar polarity; P:symmetric cell division; P:negative regulation of protein localization to cell cortex			PF11414 (PFAM); mobidb-lite (MOBIDB_LITE); PTHR14907:SF3 (PANTHER); IPR026828 (PANTHER)	no GO terms	no GO terms
TRINITY_DN369_c1_g1_i1	ACVR2A	ACVR2A - Pygocentrus nattereri activin A receptor type 2A (acvr2a), mRNA	986	20	1.78438e-21	77.63	11	P:GO:0001755; F:GO:0005524; P:GO:0006468; P:GO:0007179; F:GO:0017002; P:GO:0030902; P:GO:0032924; F:GO:0046872; C:GO:0048179; F:GO:0048185; P:GO:0051216	P:neural crest cell migration; F:ATP binding; P:protein phosphorylation; P:transforming growth factor beta receptor signaling pathway; F:activin-activated receptor activity; P:hindbrain development; P:activin receptor signaling pathway; F:metal ion binding; C:activin receptor complex; F:activin binding; P:cartilage development			no IPS match	no IPS match	no IPS match
TRINITY_DN4111_c2_g1_i1	TNS1	TNS1 - tensin-like isoform X1	4453	20	0	82.55	2	P:GO:0035556; F:GO:0046872	P:intracellular signal transduction; F:metal ion binding			IPR014020 (SMART); IPR000980 (SMART); IPR003595 (SMART); IPR014020 (PFAM); G3DSA:2.60.40.1110 (GENE3D); IPR036860 (G3DSA:3.30.505.GENE3D); IPR029021 (G3DSA:3.90.190.GENE3D); IPR000980 (PFAM); IPR011993 (G3DSA:2.30.29.GENE3D); mobidb-lite (MOBIDB_LITE); mobidb-lite (MOBIDB_LITE); mobidb-lite (MOBIDB_LITE); mobidb-lite (MOBIDB_LITE); mobidb-lite (MOBIDB_LITE); mobidb-lite (MOBIDB_LITE); mobidb-lite…	no GO terms	no GO terms
TRINITY_DN4270_c0_g1_i2	CLTC	CLTC - Pygocentrus nattereri clathrin heavy chain 1 (LOC108443353), transcript variant X4, mRNA	925	20	0	83.91	15	F:GO:0000166; P:GO:0000278; P:GO:0000398; F:GO:0003723; F:GO:0005198; C:GO:0005819; P:GO:0006886; P:GO:0006898; F:GO:0016787; C:GO:0030130; C:GO:0030132; F:GO:0032051; C:GO:0045334; P:GO:0048268; C:GO:0071439	F:nucleotide binding; P:mitotic cell cycle; P:mRNA splicing, via spliceosome; F:RNA binding; F:structural molecule activity; C:spindle; P:intracellular protein transport; P:receptor-mediated endocytosis; F:hydrolase activity; C:clathrin coat of trans-Golgi network vesicle; C:clathrin coat of coated pit; F:clathrin light chain binding; C:clathrin-coated endocytic vesicle; P:clathrin coat assembly;…			no IPS match	no IPS match	no IPS match
TRINITY_DN4455_c0_g1_i7	UNKNOWN		563									no IPS match	no IPS match	no IPS match
TRINITY_DN4479_c0_g1_i1	SRSF1	SRSF1 - RecName: Full=Serine/arginine-rich splicing factor 1; AltName: Full=Splicing factor, arginine/serine-rich 1	2536	20	1.58343e-41	78.45	35	P:GO:0000381; P:GO:0000395; F:GO:0001069; P:GO:0001701; P:GO:0002119; P:GO:0002244; C:GO:0005730; C:GO:0005829; P:GO:0006406; P:GO:0007283; F:GO:0008143; P:GO:0008406; P:GO:0010837; C:GO:0016021; C:GO:0016607; P:GO:0031124; P:GO:0032869; P:GO:0033120; C:GO:0035061; C:GO:0035145; F:GO:0036002; P:GO:0040009; F:GO:0043422; F:GO:0044547; P:GO:0045617; P:GO:0048025; F:GO:0050733; P:GO:0051726; P:GO:00…	P:regulation of alternative mRNA splicing, via spliceosome; P:mRNA 5'-splice site recognition; F:regulatory region RNA binding; P:in utero embryonic development; P:nematode larval development; P:hematopoietic progenitor cell differentiation; C:nucleolus; C:cytosol; P:mRNA export from nucleus; P:spermatogenesis; F:poly(A) binding; P:gonad development; P:regulation of keratinocyte proliferation; C:…			IPR000504 (SMART); IPR000504 (PFAM); IPR012677 (G3DSA:3.30.70.GENE3D); mobidb-lite (MOBIDB_LITE); mobidb-lite (MOBIDB_LITE); mobidb-lite (MOBIDB_LITE); mobidb-lite (MOBIDB_LITE); mobidb-lite (MOBIDB_LITE); mobidb-lite (MOBIDB_LITE); PTHR23147:SF82 (PANTHER); PTHR23147 (PANTHER); IPR000504 (PROSITE_PROFILES); cd12600 (CDD); IPR035979 (SUPERFAMILY)	F:GO:0003676	F:nucleic acid binding
TRINITY_DN4642_c0_g1_i11	DPF3	DPF3 - Astyanax mexicanus zinc finger protein DPF3 (LOC103031416), transcript variant X4, mRNA	1281	20	0	80.24	16	C:GO:0000123; F:GO:0004402; F:GO:0005096; P:GO:0006338; P:GO:0007186; P:GO:0007399; F:GO:0008270; C:GO:0016514; P:GO:0016573; P:GO:0035556; F:GO:0042393; P:GO:0043547; P:GO:0045892; P:GO:0045944; P:GO:0055008; C:GO:0071565	C:histone acetyltransferase complex; F:histone acetyltransferase activity; F:GTPase activator activity; P:chromatin remodeling; P:G protein-coupled receptor signaling pathway; P:nervous system development; F:zinc ion binding; C:SWI/SNF complex; P:histone acetylation; P:intracellular signal transduction; F:histone binding; P:positive regulation of GTPase activity; P:negative regulation of transcri…	EC:2.3.1.5; EC:2.3.1.48	Arylamine N-acetyltransferase; Histone acetyltransferase	no IPS match	no IPS match	no IPS match
TRINITY_DN5500_c0_g1_i1	ARHGEF12	ARHGEF12 - Pygocentrus nattereri rho guanine nucleotide exchange factor 12-like (LOC108428619), transcript variant X5, mRNA	7780	20	0	81.6	3	F:GO:0005089; C:GO:0005737; P:GO:0035023	F:Rho guanyl-nucleotide exchange factor activity; C:cytoplasm; P:regulation of Rho protein signal transduction			IPR001849 (SMART); IPR001478 (SMART); IPR000219 (SMART); G3DSA:2.30.42.10 (GENE3D); IPR041020 (PFAM); IPR041489 (PFAM); G3DSA:1.20.58.1850 (GENE3D); IPR035899 (G3DSA:1.20.900.GENE3D); IPR011993 (G3DSA:2.30.29.GENE3D); IPR015212 (PFAM); IPR000219 (PFAM); mobidb-lite (MOBIDB_LITE); mobidb-lite (MOBIDB_LITE); mobidb-lite (MOBIDB_LITE); mobidb-lite (MOBIDB_LITE); mobidb-lite (MOBIDB_LITE); mobidb-lit…	F:GO:0005085; F:GO:0005089; F:GO:0005515; C:GO:0005737; P:GO:0007186; P:GO:0007266	F:guanyl-nucleotide exchange factor activity; F:Rho guanyl-nucleotide exchange factor activity; F:protein binding; C:cytoplasm; P:G protein-coupled receptor signaling pathway; P:Rho protein signal transduction
TRINITY_DN5643_c0_g1_i4	HAPLN1	HAPLN1 - RecName: Full=Hyaluronan and proteoglycan link protein 1; AltName: Full=Cartilage-linking protein 1; Short=Cartilage-link protein; AltName: Full=Proteoglycan link protein; Flags: Precursor	2740	20	6.50997e-156	66.43	17	P:GO:0001501; P:GO:0002040; F:GO:0005540; P:GO:0007155; P:GO:0008065; C:GO:0016020; P:GO:0021766; P:GO:0022008; F:GO:0030021; P:GO:0031101; C:GO:0044304; P:GO:0050794; P:GO:0060074; P:GO:0065008; C:GO:0072534; P:GO:0085029; C:GO:0098978	P:skeletal system development; P:sprouting angiogenesis; F:hyaluronic acid binding; P:cell adhesion; P:establishment of blood-nerve barrier; C:membrane; P:hippocampus development; P:neurogenesis; F:extracellular matrix structural constituent conferring compression resistance; P:fin regeneration; C:main axon; P:regulation of cellular process; P:synapse maturation; P:regulation of biological qualit…			IPR000538 (PRINTS); IPR000538 (SMART); IPR003599 (SMART); IPR013106 (SMART); IPR000538 (PFAM); IPR016186 (G3DSA:3.10.100.GENE3D); IPR013106 (PFAM); IPR013783 (G3DSA:2.60.40.GENE3D); PTHR22804:SF11 (PANTHER); PTHR22804 (PANTHER); IPR000538 (PROSITE_PROFILES); IPR000538 (PROSITE_PROFILES); IPR007110 (PROSITE_PROFILES); cd03519 (CDD); cd05877 (CDD); IPR016187 (SUPERFAMILY); IPR016187 (SUPERFAMILY); …	F:GO:0005540; P:GO:0007155	F:hyaluronic acid binding; P:cell adhesion
TRINITY_DN5647_c0_g1_i7	RYR2	RYR2 - ryanodine receptor 2 isoform X9	16236	20	0	88.55	11	F:GO:0005219; F:GO:0005509; C:GO:0005790; P:GO:0007224; C:GO:0030018; C:GO:0030659; C:GO:0033017; C:GO:0034704; C:GO:0042383; F:GO:0048763; P:GO:0051209	F:ryanodine-sensitive calcium-release channel activity; F:calcium ion binding; C:smooth endoplasmic reticulum; P:smoothened signaling pathway; C:Z disc; C:cytoplasmic vesicle membrane; C:sarcoplasmic reticulum membrane; C:calcium channel complex; C:sarcolemma; F:calcium-induced calcium release activity; P:release of sequestered calcium ion into cytosol			IPR013333 (PRINTS); IPR016093 (SMART); IPR003877 (SMART); G3DSA:2.60.120.920 (GENE3D); G3DSA:2.80.10.50 (GENE3D); G3DSA:1.25.10.120 (GENE3D); IPR000699 (PFAM); G3DSA:2.60.120.920 (GENE3D); G3DSA:2.60.120.920 (GENE3D); IPR003032 (PFAM); IPR014821 (PFAM); IPR013662 (PFAM); G3DSA:1.10.238.10 (GENE3D); IPR005821 (PFAM); IPR009460 (PFAM); G3DSA:1.10.490.160 (GENE3D); G3DSA:2.80.10.50 (GENE3D); IPR0038…	F:GO:0005216; F:GO:0005219; F:GO:0005262; F:GO:0005509; F:GO:0005515; P:GO:0006811; P:GO:0006816; P:GO:0006874; C:GO:0016020; C:GO:0016021; P:GO:0055085; P:GO:0070588	F:ion channel activity; F:ryanodine-sensitive calcium-release channel activity; F:calcium channel activity; F:calcium ion binding; F:protein binding; P:ion transport; P:calcium ion transport; P:cellular calcium ion homeostasis; C:membrane; C:integral component of membrane; P:transmembrane transport; P:calcium ion transmembrane transport
TRINITY_DN5961_c0_g1_i3	HDAC4	HDAC4 - RecName: Full=Histone deacetylase 4; Short=HD4	6030	20	0	74.11	151	C:GO:0000118; P:GO:0000209; C:GO:0000790; F:GO:0000978; F:GO:0001085; F:GO:0001226; F:GO:0001227; P:GO:0001570; P:GO:0001755; P:GO:0001975; P:GO:0002076; F:GO:0003714; F:GO:0005080; C:GO:0005667; C:GO:0005771; C:GO:0005794; C:GO:0005829; C:GO:0005881; C:GO:0005901; P:GO:0006338; P:GO:0006342; P:GO:0006515; P:GO:0006954; P:GO:0006974; P:GO:0007026; P:GO:0007043; P:GO:0007507; F:GO:0008013; F:GO:00…	C:histone deacetylase complex; P:protein polyubiquitination; C:nuclear chromatin; F:RNA polymerase II cis-regulatory region sequence-specific DNA binding; F:RNA polymerase II transcription factor binding; F:RNA polymerase II transcription corepressor binding; F:DNA-binding transcription repressor activity, RNA polymerase II-specific; P:vasculogenesis; P:neural crest cell migration; P:response to …	EC:3.5.1.98; EC:3.5.1.48	Histone deacetylase; Acetylspermidine deacetylase	IPR000286 (PRINTS); IPR017320 (PIRSF); IPR023801 (PFAM); IPR037138 (G3DSA:3.40.800.GENE3D); IPR024643 (PFAM); mobidb-lite (MOBIDB_LITE); mobidb-lite (MOBIDB_LITE); mobidb-lite (MOBIDB_LITE); mobidb-lite (MOBIDB_LITE); mobidb-lite (MOBIDB_LITE); mobidb-lite (MOBIDB_LITE); mobidb-lite (MOBIDB_LITE); mobidb-lite (MOBIDB_LITE); IPR033660 (PTHR45364:PANTHER); PTHR45364 (PANTHER); cd10162 (CDD); IPR023…	C:GO:0000118; F:GO:0004407; P:GO:0006325; P:GO:0016575	C:histone deacetylase complex; F:histone deacetylase activity; P:chromatin organization; P:histone deacetylation
TRINITY_DN5984_c0_g1_i4	ANK3	ANK3 - RecName: Full=Ankyrin-3; Short=ANK-3; AltName: Full=Ankyrin-G	9783	20	0	59.8	62	C:GO:0000785; P:GO:0001955; P:GO:0002027; F:GO:0003682; F:GO:0003723; C:GO:0005654; C:GO:0005768; C:GO:0005856; C:GO:0005911; P:GO:0006275; P:GO:0006357; P:GO:0006935; P:GO:0007009; P:GO:0007010; P:GO:0007492; F:GO:0008092; P:GO:0010604; P:GO:0010882; C:GO:0016021; P:GO:0016032; P:GO:0016192; C:GO:0016323; F:GO:0019899; F:GO:0030674; P:GO:0031647; C:GO:0031672; C:GO:0031965; P:GO:0032414; P:GO:00…	C:chromatin; P:blood vessel maturation; P:regulation of heart rate; F:chromatin binding; F:RNA binding; C:nucleoplasm; C:endosome; C:cytoskeleton; C:cell-cell junction; P:regulation of DNA replication; P:regulation of transcription by RNA polymerase II; P:chemotaxis; P:plasma membrane organization; P:cytoskeleton organization; P:endoderm development; F:cytoskeletal protein binding; P:positive reg…			IPR002110 (PRINTS); IPR004087 (SMART); IPR002110 (SMART); IPR024600 (SMART); IPR004088 (PFAM); IPR024600 (PFAM); IPR036770 (G3DSA:1.25.40.GENE3D); IPR036612 (G3DSA:3.30.1370.GENE3D); IPR036770 (G3DSA:1.25.40.GENE3D); IPR036770 (G3DSA:1.25.40.GENE3D); IPR020683 (PFAM); IPR036770 (G3DSA:1.25.40.GENE3D); IPR036770 (G3DSA:1.25.40.GENE3D); IPR036770 (G3DSA:1.25.40.GENE3D); IPR036770 (G3DSA:1.25.40.GEN…	F:GO:0003676; F:GO:0003723; F:GO:0005515	F:nucleic acid binding; F:RNA binding; F:protein binding
TRINITY_DN6168_c0_g1_i3	LARP7	LARP7 - RecName: Full=La-related protein 7; AltName: Full=La ribonucleoprotein domain family member 7	2096	20	7.37127e-113	63.9	20	P:GO:0000122; C:GO:0000791; F:GO:0003729; F:GO:0005515; C:GO:0005654; C:GO:0005829; P:GO:0006409; P:GO:0006417; F:GO:0008098; F:GO:0008266; P:GO:0009891; P:GO:0035562; P:GO:0036093; P:GO:0042780; P:GO:0060043; P:GO:0061026; P:GO:0071045; P:GO:1900087; P:GO:1903608; C:GO:1990904	P:negative regulation of transcription by RNA polymerase II; C:euchromatin; F:mRNA binding; F:protein binding; C:nucleoplasm; C:cytosol; P:tRNA export from nucleus; P:regulation of translation; F:5S rRNA primary transcript binding; F:poly(U) RNA binding; P:positive regulation of biosynthetic process; P:negative regulation of chromatin binding; P:germ cell proliferation; P:tRNA 3'-end processing; …			IPR002344 (PRINTS); IPR000504 (SMART); IPR006630 (SMART); IPR012677 (G3DSA:3.30.70.GENE3D); IPR000504 (PFAM); IPR006630 (PFAM); IPR012677 (G3DSA:3.30.70.GENE3D); IPR014886 (PFAM); IPR036388 (G3DSA:1.10.10.GENE3D); mobidb-lite (MOBIDB_LITE); mobidb-lite (MOBIDB_LITE); mobidb-lite (MOBIDB_LITE); mobidb-lite (MOBIDB_LITE); mobidb-lite (MOBIDB_LITE); mobidb-lite (MOBIDB_LITE); mobidb-lite (MOBIDB_LIT…	F:GO:0003676; F:GO:0003723; C:GO:0005634; P:GO:0006396; C:GO:1990904	F:nucleic acid binding; F:RNA binding; C:nucleus; P:RNA processing; C:ribonucleoprotein complex
TRINITY_DN62068_c0_g1_i2	DENND5B	DENND5B - Pygocentrus nattereri DENN domain containing 5B (dennd5b), transcript variant X7, mRNA	219	8	3.22065e-73	93.44	2	C:GO:0016021; F:GO:0017112	C:integral component of membrane; F:Rab guanyl-nucleotide exchange factor activity			no IPS match	no IPS match	no IPS match
TRINITY_DN6285_c0_g1_i5	SNAP25	SNAP25 - RecName: Full=Synaptosomal-associated protein 25; Short=SNAP-25; AltName: Full=Synaptosomal-associated 25 kDa protein	2076	7	4.67259e-10	92.86	58	P:GO:0000281; P:GO:0001504; C:GO:0001917; F:GO:0005249; F:GO:0005484; C:GO:0005768; C:GO:0005802; P:GO:0007409; P:GO:0007616; P:GO:0007626; C:GO:0008021; C:GO:0008076; P:GO:0008306; P:GO:0010975; P:GO:0014047; C:GO:0015629; P:GO:0016081; P:GO:0016082; P:GO:0016197; F:GO:0017022; F:GO:0017075; F:GO:0019904; C:GO:0030027; C:GO:0030054; C:GO:0030175; P:GO:0030252; P:GO:0030431; C:GO:0031083; C:GO:00…	P:mitotic cytokinesis; P:neurotransmitter uptake; C:photoreceptor inner segment; F:voltage-gated potassium channel activity; F:SNAP receptor activity; C:endosome; C:trans-Golgi network; P:axonogenesis; P:long-term memory; P:locomotory behavior; C:synaptic vesicle; C:voltage-gated potassium channel complex; P:associative learning; P:regulation of neuron projection development; P:glutamate secretio…			no IPS match	no IPS match	no IPS match
TRINITY_DN6937_c1_g1_i3	GALNT1	GALNT1- RecName: Full=Polypeptide N-acetylgalactosaminyltransferase 1; AltName: Full=Polypeptide GalNAc transferase 1; Short=GalNAc-T1; Short=pp-GaNTase 1; AltName: Full=Protein-UDP acetylgalactosaminyltransferase 1; AltName: Full=UDP-GalNAc:polypeptide N-acetylgalactosaminyltransferase 1; Contains: RecName: Full=Polypeptide N-acetylgalactosaminyltransferase 1 soluble form	1145	20	0	62.88	13	C:GO:0000139; F:GO:0004653; F:GO:0005112; P:GO:0008593; P:GO:0009312; C:GO:0016021; P:GO:0016266; P:GO:0018242; P:GO:0018243; F:GO:0030246; C:GO:0031985; P:GO:0032504; F:GO:0046872	C:Golgi membrane; F:polypeptide N-acetylgalactosaminyltransferase activity; F:Notch binding; P:regulation of Notch signaling pathway; P:oligosaccharide biosynthetic process; C:integral component of membrane; P:O-glycan processing; P:protein O-linked glycosylation via serine; P:protein O-linked glycosylation via threonine; F:carbohydrate binding; C:Golgi cisterna; P:multicellular organism reproduc…	EC:2.4.1.41	Polypeptide N-acetylgalactosaminyltransferase	IPR000772 (SMART); IPR029044 (G3DSA:3.90.550.GENE3D); IPR000772 (PFAM); G3DSA:2.80.10.50 (GENE3D); PTHR11675 (PANTHER); PTHR11675:SF110 (PANTHER); IPR000772 (PROSITE_PROFILES); IPR000772 (CDD); IPR029044 (SUPERFAMILY); IPR035992 (SUPERFAMILY)	no GO terms	no GO terms
TRINITY_DN7574_c0_g1_i2	UBN1	UBN1 - Pygocentrus nattereri ubinuclein 1 (ubn1), transcript variant X2, mRNA	4161	20	0	78.36	2	C:GO:0005634; P:GO:0006325	C:nucleus; P:chromatin organization			IPR026947 (PFAM); mobidb-lite (MOBIDB_LITE); mobidb-lite (MOBIDB_LITE); mobidb-lite (MOBIDB_LITE); mobidb-lite (MOBIDB_LITE); mobidb-lite (MOBIDB_LITE); mobidb-lite (MOBIDB_LITE); mobidb-lite (MOBIDB_LITE); IPR026936 (PTHR21669:PANTHER); PTHR21669 (PANTHER); IPR026936 (PTHR21669:PANTHER); PTHR21669 (PANTHER)	C:GO:0005634; P:GO:0006325	C:nucleus; P:chromatin organization
TRINITY_DN76_c1_g1_i1	SLC38A3	SLC38A3 - Astyanax mexicanus sodium-coupled neutral amino acid transporter 3 (LOC103042420), mRNA	2518	20	2.95786e-36	78.75	3	P:GO:0003333; C:GO:0005887; F:GO:0015171	P:amino acid transmembrane transport; C:integral component of plasma membrane; F:amino acid transmembrane transporter activity			no IPS match	no IPS match	no IPS match
TRINITY_DN76_c1_g1_i2	SLC38A3	SLC38A3 - Astyanax mexicanus sodium-coupled neutral amino acid transporter 3 (LOC103042420), mRNA	2549	20	2.99486e-36	78.75	3	P:GO:0003333; C:GO:0005887; F:GO:0015171	P:amino acid transmembrane transport; C:integral component of plasma membrane; F:amino acid transmembrane transporter activity			no IPS match	no IPS match	no IPS match
TRINITY_DN80_c0_g1_i1	RTN1	RTN1 - Pygocentrus nattereri reticulon 1 (rtn1), transcript variant X2, mRNA	2453	20	0	82.86	5	F:GO:0003674; C:GO:0005783; C:GO:0005789; P:GO:0008150; C:GO:0016021	F:molecular_function; C:endoplasmic reticulum; C:endoplasmic reticulum membrane; P:biological_process; C:integral component of membrane			IPR003388 (PFAM); PTHR45799:SF5 (PANTHER); PTHR45799 (PANTHER); IPR003388 (PROSITE_PROFILES)	no GO terms	no GO terms
TRINITY_DN8509_c0_g1_i7	MTMR2	MTMR2 - RecName: Full=Myotubularin-related protein 2; AltName: Full=Phosphatidylinositol-3,5-bisphosphate 3-phosphatase; AltName: Full=Phosphatidylinositol-3-phosphate phosphatase	6585	20	0	55.51	33	P:GO:0001558; F:GO:0001691; F:GO:0004438; F:GO:0004725; C:GO:0005774; C:GO:0005789; C:GO:0005829; P:GO:0006470; P:GO:0006661; P:GO:0006914; P:GO:0007283; F:GO:0008138; P:GO:0009966; C:GO:0016021; C:GO:0016604; F:GO:0017112; F:GO:0019902; P:GO:0031323; P:GO:0031645; C:GO:0031901; F:GO:0035091; P:GO:0042552; C:GO:0043005; P:GO:0043086; P:GO:0043087; C:GO:0045202; P:GO:0046856; C:GO:0048471; P:GO:00…	P:regulation of cell growth; F:pseudophosphatase activity; F:phosphatidylinositol-3-phosphatase activity; F:protein tyrosine phosphatase activity; C:vacuolar membrane; C:endoplasmic reticulum membrane; C:cytosol; P:protein dephosphorylation; P:phosphatidylinositol biosynthetic process; P:autophagy; P:spermatogenesis; F:protein tyrosine/serine/threonine phosphatase activity; P:regulation of signal…	EC:3.1.3.16	Protein-serine/threonine phosphatase	IPR004182 (SMART); IPR001194 (SMART); IPR005113 (SMART); IPR001849 (SMART); IPR005112 (SMART); IPR011993 (G3DSA:2.30.29.GENE3D); IPR001849 (PFAM); IPR001194 (PFAM); IPR005113 (PFAM); IPR022096 (PFAM); IPR010569 (PFAM); IPR004182 (PFAM); G3DSA:3.30.450.200 (GENE3D); G3DSA:3.40.50.11500 (GENE3D); mobidb-lite (MOBIDB_LITE); mobidb-lite (MOBIDB_LITE); mobidb-lite (MOBIDB_LITE); IPR030564 (PANTHER); I…	F:GO:0019208; P:GO:0043087	F:phosphatase regulator activity; P:regulation of GTPase activity
TRINITY_DN8509_c0_g1_i8	MTMR2	MTMR2 - RecName: Full=Myotubularin-related protein 2; AltName: Full=Phosphatidylinositol-3,5-bisphosphate 3-phosphatase; AltName: Full=Phosphatidylinositol-3-phosphate phosphatase	6660	20	0	57.36	33	P:GO:0001558; F:GO:0001691; F:GO:0004438; F:GO:0004725; C:GO:0005774; C:GO:0005789; C:GO:0005829; P:GO:0006470; P:GO:0006661; P:GO:0006914; P:GO:0007283; F:GO:0008138; P:GO:0009966; C:GO:0016021; C:GO:0016604; F:GO:0017112; F:GO:0019902; P:GO:0031329; P:GO:0031645; C:GO:0031901; F:GO:0035091; P:GO:0042552; C:GO:0043005; P:GO:0043086; P:GO:0043087; C:GO:0045202; P:GO:0046856; C:GO:0048471; P:GO:00…	P:regulation of cell growth; F:pseudophosphatase activity; F:phosphatidylinositol-3-phosphatase activity; F:protein tyrosine phosphatase activity; C:vacuolar membrane; C:endoplasmic reticulum membrane; C:cytosol; P:protein dephosphorylation; P:phosphatidylinositol biosynthetic process; P:autophagy; P:spermatogenesis; F:protein tyrosine/serine/threonine phosphatase activity; P:regulation of signal…	EC:3.1.3.16	Protein-serine/threonine phosphatase	IPR004182 (SMART); IPR001849 (SMART); IPR001194 (SMART); IPR005113 (SMART); IPR005112 (SMART); IPR005113 (PFAM); G3DSA:3.40.50.11500 (GENE3D); IPR010569 (PFAM); IPR022096 (PFAM); IPR001849 (PFAM); IPR011993 (G3DSA:2.30.29.GENE3D); IPR001194 (PFAM); G3DSA:3.30.450.200 (GENE3D); IPR004182 (PFAM); mobidb-lite (MOBIDB_LITE); mobidb-lite (MOBIDB_LITE); mobidb-lite (MOBIDB_LITE); IPR030564 (PANTHER); I…	F:GO:0019208; P:GO:0043087	F:phosphatase regulator activity; P:regulation of GTPase activity
TRINITY_DN896_c0_g1_i2	HSDL2	HSDL2 - RecName: Full=Hydroxysteroid dehydrogenase-like protein 2	2195	20	0	65.95	30	F:GO:0000062; F:GO:0003988; C:GO:0005634; C:GO:0005782; C:GO:0005783; C:GO:0005829; P:GO:0007568; F:GO:0008526; F:GO:0015485; P:GO:0015914; F:GO:0016491; C:GO:0031315; C:GO:0031410; P:GO:0032355; P:GO:0032385; C:GO:0032991; P:GO:0034699; F:GO:0042802; P:GO:0043065; F:GO:0044877; P:GO:0045542; F:GO:0050632; P:GO:0055114; F:GO:0070538; P:GO:0071397; P:GO:0072659; F:GO:0120019; F:GO:0120020; P:GO:19…	F:fatty-acyl-CoA binding; F:acetyl-CoA C-acyltransferase activity; C:nucleus; C:peroxisomal matrix; C:endoplasmic reticulum; C:cytosol; P:aging; F:phosphatidylinositol transfer activity; F:cholesterol binding; P:phospholipid transport; F:oxidoreductase activity; C:extrinsic component of mitochondrial outer membrane; C:cytoplasmic vesicle; P:response to estradiol; P:positive regulation of intracel…	EC:2.3.1.176; EC:2.3.1.16	Propanoyl-CoA C-acyltransferase; Acetyl-CoA C-acyltransferase	IPR002347 (PRINTS); G3DSA:3.40.50.720 (GENE3D); IPR003033 (PFAM); IPR036527 (G3DSA:3.30.1050.GENE3D); IPR002347 (PFAM); PTHR42808 (PANTHER); PTHR42808:SF3 (PANTHER); cd09762 (CDD); IPR036291 (SUPERFAMILY); IPR036527 (SUPERFAMILY)	no GO terms	no GO terms
TRINITY_DN9116_c0_g1_i1	Cacna1a	Cacna1a - Pygocentrus nattereri voltage-dependent P/Q-type calcium channel subunit alpha-1A-like (LOC108414624), transcript variant X8, mRNA	3269	20	0	84.89	9	P:GO:0001966; F:GO:0005509; C:GO:0005891; P:GO:0007274; F:GO:0008331; P:GO:0034765; P:GO:0036269; P:GO:0070509; P:GO:0070588	P:thigmotaxis; F:calcium ion binding; C:voltage-gated calcium channel complex; P:neuromuscular synaptic transmission; F:high voltage-gated calcium channel activity; P:regulation of ion transmembrane transport; P:swimming behavior; P:calcium ion import; P:calcium ion transmembrane transport			mobidb-lite (MOBIDB_LITE)	no GO terms	no GO terms
TRINITY_DN9782_c0_g1_i4	PPM1H	Pygocentrus nattereri protein phosphatase 1H-like (LOC108429443), transcript variant X2, mRNA	2203	20	0	79.6	5	F:GO:0004724; F:GO:0004741; C:GO:0005634; C:GO:0005739; P:GO:1904184	F:magnesium-dependent protein serine/threonine phosphatase activity; F:[pyruvate dehydrogenase (lipoamide)] phosphatase activity; C:nucleus; C:mitochondrion; P:positive regulation of pyruvate dehydrogenase activity	EC:3.1.3.16; EC:3.1.3.43	Protein-serine/threonine phosphatase; [Pyruvate dehydrogenase (acetyl-transferring)]-phosphatase	IPR001932 (SMART); IPR001932 (PFAM); mobidb-lite (MOBIDB_LITE); PTHR13832:SF287 (PANTHER); IPR015655 (PANTHER); IPR001932 (PROSITE_PROFILES); IPR001932 (CDD); IPR036457 (SUPERFAMILY)	F:GO:0003824; F:GO:0004722; P:GO:0006470	F:catalytic activity; F:protein serine/threonine phosphatase activity; P:protein dephosphorylation

## Sheet: EI.Up-DTE
SeqName	Gene ID	Description	Length	#Hits	e-Value	sim mean	#GO	GO IDs	GO Names	Enzyme Codes	Enzyme Names	InterPro IDs	InterPro GO IDs	InterPro GO Names
TRINITY_DN10078_c0_g1_i3	SCY1	RecName: Full=N-terminal kinase-like protein; AltName: Full=SCY1-like protein 1	4427	20	0	56.36	18	F:GO:0003677; F:GO:0004713; F:GO:0005515; F:GO:0005524; C:GO:0005634; C:GO:0005793; C:GO:0005801; C:GO:0005813; C:GO:0005829; P:GO:0006890; P:GO:0006954; P:GO:0018108; P:GO:0021522; C:GO:0030126; P:GO:0034613; P:GO:0046907; P:GO:0048666; P:GO:0050794	F:DNA binding; F:protein tyrosine kinase activity; F:protein binding; F:ATP binding; C:nucleus; C:endoplasmic reticulum-Golgi intermediate compartment; C:cis-Golgi network; C:centrosome; C:cytosol; P:retrograde vesicle-mediated transport, Golgi to endoplasmic reticulum; P:inflammatory response; P:peptidyl-tyrosine phosphorylation; P:spinal cord motor neuron differentiation; C:COPI vesicle coat; P…	EC:2.7.10	Transferring phosphorus-containing groups	G3DSA:1.10.510.10 (GENE3D); IPR000719 (PFAM); G3DSA:3.30.200.20 (GENE3D); IPR011989 (G3DSA:1.25.10.GENE3D); mobidb-lite (MOBIDB_LITE); mobidb-lite (MOBIDB_LITE); mobidb-lite (MOBIDB_LITE); mobidb-lite (MOBIDB_LITE); mobidb-lite (MOBIDB_LITE); mobidb-lite (MOBIDB_LITE); mobidb-lite (MOBIDB_LITE); PTHR12984:SF3 (PANTHER); PTHR12984 (PANTHER); IPR000719 (PROSITE_PROFILES); IPR021133 (PROSITE_PROFILE…	F:GO:0004672; F:GO:0005524; P:GO:0006468	F:protein kinase activity; F:ATP binding; P:protein phosphorylation
TRINITY_DN11534_c0_g1_i4	ECHS1	RecName: Full=Enoyl-CoA hydratase, mitochondrial; AltName: Full=Enoyl-CoA hydratase 1; AltName: Full=Short-chain enoyl-CoA hydratase; Short=SCEH; Flags: Precursor	4247	20	0	62.47	20	F:GO:0003682; F:GO:0003714; F:GO:0004165; F:GO:0004300; F:GO:0004402; C:GO:0005694; C:GO:0005739; C:GO:0005782; C:GO:0005829; P:GO:0006625; P:GO:0007286; P:GO:0016573; C:GO:0016607; F:GO:0030674; P:GO:0033540; F:GO:0035064; P:GO:0060816; F:GO:0120092; P:GO:0120094; P:GO:1903507	F:chromatin binding; F:transcription corepressor activity; F:dodecenoyl-CoA delta-isomerase activity; F:enoyl-CoA hydratase activity; F:histone acetyltransferase activity; C:chromosome; C:mitochondrion; C:peroxisomal matrix; C:cytosol; P:protein targeting to peroxisome; P:spermatid development; P:histone acetylation; C:nuclear speck; F:protein binding, bridging; P:fatty acid beta-oxidation using …	EC:2.3.1.5; EC:2.3.1.48; EC:5.3.3.8	Arylamine N-acetyltransferase; Histone acetyltransferase; Delta(3)-Delta(2)-enoyl-CoA isomerase	IPR017984 (PRINTS); IPR000953 (SMART); IPR023780 (PFAM); G3DSA:3.90.226.10 (GENE3D); IPR001753 (PFAM); G3DSA:2.40.50.40 (GENE3D); mobidb-lite (MOBIDB_LITE); mobidb-lite (MOBIDB_LITE); mobidb-lite (MOBIDB_LITE); mobidb-lite (MOBIDB_LITE); PTHR43684 (PANTHER); PTHR43684:SF5 (PANTHER); IPR000953 (PROSITE_PROFILES); cd06558 (CDD); cd18634 (CDD); IPR029045 (SUPERFAMILY); IPR016197 (SUPERFAMILY)	F:GO:0003824	F:catalytic activity
TRINITY_DN1190_c0_g2_i7	UNKNOWN		951									no IPS match	no IPS match	no IPS match
TRINITY_DN14489_c0_g1_i4	UNKNOWN		612									no IPS match	no IPS match	no IPS match
TRINITY_DN149_c0_g1_i7	VSNL1	Visinin-like protein 1	2866	20	2.22134e-130	99.01	2	F:GO:0005509; C:GO:0005575	F:calcium ion binding; C:cellular_component			PR00450 (PRINTS); IPR002048 (SMART); G3DSA:1.10.238.10 (GENE3D); IPR002048 (PFAM); IPR002048 (PFAM); IPR029533 (PTHR23055:PANTHER); IPR028846 (PANTHER); IPR002048 (PROSITE_PROFILES); IPR002048 (PROSITE_PROFILES); IPR002048 (PROSITE_PROFILES); IPR002048 (PROSITE_PROFILES); IPR002048 (CDD); IPR002048 (CDD); IPR011992 (SUPERFAMILY)	F:GO:0005509	F:calcium ion binding
TRINITY_DN15121_c0_g1_i3	UTP6	Pygocentrus nattereri UTP6, small subunit processome component (utp6), mRNA	1173	20	0	86.82	4	P:GO:0000462; F:GO:0030515; C:GO:0032040; C:GO:0034388	P:maturation of SSU-rRNA from tricistronic rRNA transcript (SSU-rRNA, 5.8S rRNA, LSU-rRNA); F:snoRNA binding; C:small-subunit processome; C:Pwp2p-containing subcomplex of 90S preribosome			no IPS match	no IPS match	no IPS match
TRINITY_DN15811_c0_g1_i1	RBMS3	Astyanax mexicanus RNA-binding motif, single-stranded-interacting protein 3-like (LOC103033149), transcript variant X1, mRNA	1448	20	0	78.86	4	F:GO:0003723; P:GO:0017015; P:GO:0061035; C:GO:1990904	F:RNA binding; P:regulation of transforming growth factor beta receptor signaling pathway; P:regulation of cartilage development; C:ribonucleoprotein complex			IPR002343 (PRINTS); IPR000504 (SMART); IPR000504 (PFAM); IPR012677 (G3DSA:3.30.70.GENE3D); IPR012677 (G3DSA:3.30.70.GENE3D); mobidb-lite (MOBIDB_LITE); PTHR24012:SF742 (PANTHER); PTHR24012 (PANTHER); IPR000504 (PROSITE_PROFILES); IPR000504 (PROSITE_PROFILES); IPR035979 (SUPERFAMILY); IPR035979 (SUPERFAMILY)	F:GO:0003676; F:GO:0003723; C:GO:1990904	F:nucleic acid binding; F:RNA binding; C:ribonucleoprotein complex
TRINITY_DN16731_c0_g1_i4	odhA	RecName: Full=2-oxoglutarate dehydrogenase E1 component; AltName: Full=Alpha-ketoglutarate dehydrogenase	4894	20	0	66.52	8	P:GO:0002244; F:GO:0004591; C:GO:0005759; C:GO:0005829; P:GO:0006096; P:GO:0006099; F:GO:0030976; C:GO:0045252	P:hematopoietic progenitor cell differentiation; F:oxoglutarate dehydrogenase (succinyl-transferring) activity; C:mitochondrial matrix; C:cytosol; P:glycolytic process; P:tricarboxylic acid cycle; F:thiamine pyrophosphate binding; C:oxoglutarate dehydrogenase complex	EC:1.2.4.2	Oxoglutarate dehydrogenase (succinyl-transferring)	IPR005475 (SMART); G3DSA:3.40.50.12470 (GENE3D); G3DSA:3.40.50.970 (GENE3D); IPR005475 (PFAM); IPR031717 (PFAM); IPR001017 (PFAM); IPR042179 (G3DSA:3.40.50.GENE3D); PTHR23152:SF21 (PANTHER); IPR011603 (PANTHER); IPR029061 (SUPERFAMILY); IPR029061 (SUPERFAMILY)	F:GO:0004591; P:GO:0006099; F:GO:0016624; F:GO:0030976; P:GO:0055114	F:oxoglutarate dehydrogenase (succinyl-transferring) activity; P:tricarboxylic acid cycle; F:oxidoreductase activity, acting on the aldehyde or oxo group of donors, disulfide as acceptor; F:thiamine pyrophosphate binding; P:oxidation-reduction process
TRINITY_DN18392_c0_g3_i2	LIG3	Pygocentrus nattereri DNA ligase 3 (lig3), transcript variant X1, mRNA	5141	18	0	83.79	12	F:GO:0003677; F:GO:0003910; F:GO:0005524; C:GO:0005739; P:GO:0006273; P:GO:0006288; P:GO:0006310; F:GO:0008270; P:GO:0043504; C:GO:0070421; P:GO:0071897; P:GO:0097681	F:DNA binding; F:DNA ligase (ATP) activity; F:ATP binding; C:mitochondrion; P:lagging strand elongation; P:base-excision repair, DNA ligation; P:DNA recombination; F:zinc ion binding; P:mitochondrial DNA repair; C:DNA ligase III-XRCC1 complex; P:DNA biosynthetic process; P:double-strand break repair via alternative nonhomologous end joining			IPR001510 (SMART); G3DSA:2.40.50.140 (GENE3D); IPR031916 (PFAM); G3DSA:3.30.1490.70 (GENE3D); IPR012310 (PFAM); IPR036420 (G3DSA:3.40.50.GENE3D); IPR012308 (PFAM); IPR012309 (PFAM); IPR036957 (G3DSA:3.30.1740.GENE3D); IPR001510 (PFAM); G3DSA:3.30.470.30 (GENE3D); IPR000977 (TIGRFAM); IPR036599 (G3DSA:1.10.3260.GENE3D); mobidb-lite (MOBIDB_LITE); mobidb-lite (MOBIDB_LITE); mobidb-lite (MOBIDB_LITE…	F:GO:0003677; F:GO:0003910; F:GO:0005524; P:GO:0006281; P:GO:0006310; F:GO:0008270; P:GO:0071897	F:DNA binding; F:DNA ligase (ATP) activity; F:ATP binding; P:DNA repair; P:DNA recombination; F:zinc ion binding; P:DNA biosynthetic process
TRINITY_DN19124_c1_g1_i1	CHST11	Pygocentrus nattereri carbohydrate (chondroitin 4) sulfotransferase 11 (chst11), transcript variant X2, mRNA	666	20	3.88825e-15	79.59	7	C:GO:0000139; P:GO:0007517; P:GO:0008045; C:GO:0016021; P:GO:0016051; P:GO:0030206; F:GO:0047756	C:Golgi membrane; P:muscle organ development; P:motor neuron axon guidance; C:integral component of membrane; P:carbohydrate biosynthetic process; P:chondroitin sulfate biosynthetic process; F:chondroitin 4-sulfotransferase activity			no IPS match	no IPS match	no IPS match
TRINITY_DN19965_c0_g1_i6	TMEM243	Pygocentrus nattereri transmembrane protein 243 (tmem243), transcript variant X1, mRNA	1438	20	0	78.38	3	F:GO:0003674; P:GO:0008150; C:GO:0016021	F:molecular_function; P:biological_process; C:integral component of membrane			IPR022564 (PFAM); IPR022564 (PANTHER); PD456474 (PRODOM)	no GO terms	no GO terms
TRINITY_DN21448_c0_g1_i1	MDGA2	Pygocentrus nattereri MAM domain-containing glycosylphosphatidylinositol anchor protein 2-like (LOC108411484), transcript variant X2, mRNA	1483	20	0	78.51	4	C:GO:0016020; P:GO:0021611; P:GO:0021731; P:GO:1905483	C:membrane; P:facial nerve formation; P:trigeminal motor nucleus development; P:regulation of motor neuron migration			no IPS match	no IPS match	no IPS match
TRINITY_DN24039_c0_g1_i2	SSPO	RecName: Full=SCO-spondin; Flags: Precursor	7614	20	0	53.78	29	F:GO:0002020; P:GO:0002376; P:GO:0002576; F:GO:0005178; F:GO:0005518; C:GO:0005615; C:GO:0005783; P:GO:0007165; P:GO:0007597; P:GO:0009605; P:GO:0009719; C:GO:0016020; F:GO:0019865; P:GO:0022600; P:GO:0030154; P:GO:0030168; P:GO:0030198; P:GO:0031589; C:GO:0033093; P:GO:0033993; P:GO:0042592; F:GO:0042803; F:GO:0047485; P:GO:0048523; P:GO:0048731; F:GO:0051087; P:GO:0051260; C:GO:0062023; C:GO:00…	F:protease binding; P:immune system process; P:platelet degranulation; F:integrin binding; F:collagen binding; C:extracellular space; C:endoplasmic reticulum; P:signal transduction; P:blood coagulation, intrinsic pathway; P:response to external stimulus; P:response to endogenous stimulus; C:membrane; F:immunoglobulin binding; P:digestive system process; P:cell differentiation; P:platelet activati…			IPR001846 (SMART); IPR014853 (SMART); IPR006207 (SMART); IPR001007 (SMART); IPR002035 (SMART); IPR036465 (G3DSA:3.40.50.GENE3D); IPR014853 (PFAM); G3DSA:2.10.25.10 (GENE3D); IPR036465 (G3DSA:3.40.50.GENE3D); IPR002919 (PFAM); IPR002035 (PFAM); IPR001846 (PFAM); IPR036465 (G3DSA:3.40.50.GENE3D); mobidb-lite (MOBIDB_LITE); mobidb-lite (MOBIDB_LITE); PTHR11339 (PANTHER); IPR037578 (PTHR11339:PANTHER…	F:GO:0005515	F:protein binding
TRINITY_DN2649_c0_g1_i19	CAPS-1	RecName: Full=Calcium-dependent secretion activator 1; AltName: Full=Calcium-dependent activator protein for secretion 1; Short=CAPS-1	5234	9	0	81.92	33	P:GO:0001820; F:GO:0005509; F:GO:0005546; C:GO:0005654; C:GO:0005829; P:GO:0006937; P:GO:0007419; P:GO:0007635; C:GO:0008021; P:GO:0009267; P:GO:0015031; P:GO:0016050; P:GO:0016082; P:GO:0018991; F:GO:0019901; C:GO:0030054; C:GO:0030424; P:GO:0030536; P:GO:0035249; C:GO:0042734; C:GO:0043025; C:GO:0045211; P:GO:0045956; P:GO:0050432; P:GO:0071244; P:GO:0090325; C:GO:0098674; C:GO:0098688; C:GO:00…	P:serotonin secretion; F:calcium ion binding; F:phosphatidylinositol-4,5-bisphosphate binding; C:nucleoplasm; C:cytosol; P:regulation of muscle contraction; P:ventral cord development; P:chemosensory behavior; C:synaptic vesicle; P:cellular response to starvation; P:protein transport; P:vesicle organization; P:synaptic vesicle priming; P:oviposition; F:protein kinase binding; C:cell junction; C:a…			IPR001849 (SMART); IPR010439 (SMART); IPR011993 (G3DSA:2.30.29.GENE3D); IPR010439 (PFAM); IPR001849 (PFAM); mobidb-lite (MOBIDB_LITE); mobidb-lite (MOBIDB_LITE); mobidb-lite (MOBIDB_LITE); PTHR12166:SF4 (PANTHER); IPR033227 (PANTHER); IPR014770 (PROSITE_PROFILES); IPR001849 (PROSITE_PROFILES); cd01234 (CDD); SSF50729 (SUPERFAMILY)	P:GO:0016079; P:GO:1990504	P:synaptic vesicle exocytosis; P:dense core granule exocytosis
TRINITY_DN28163_c0_g1_i1	UNKNOWN		1732									mobidb-lite (MOBIDB_LITE); mobidb-lite (MOBIDB_LITE); mobidb-lite (MOBIDB_LITE); mobidb-lite (MOBIDB_LITE); IPR013087 (PROSITE_PROFILES); cd16855 (CDD)	F:GO:0003676	F:nucleic acid binding
TRINITY_DN2832_c0_g1_i6	ARGLU1	Astyanax mexicanus arginine and glutamate-rich protein 1-B (LOC103029609), transcript variant X2, misc_RNA	2023	19	2.06536e-138	88.44	4	F:GO:0003674; C:GO:0005654; C:GO:0005739; P:GO:0008150	F:molecular_function; C:nucleoplasm; C:mitochondrion; P:biological_process			no IPS match	no IPS match	no IPS match
TRINITY_DN316_c0_g1_i1	PPP2R1B	RecName: Full=Serine/threonine-protein phosphatase 2A 65 kDa regulatory subunit A beta isoform; AltName: Full=PP2A subunit A isoform PR65-beta; AltName: Full=PP2A subunit A isoform R1-beta	2252	19	0	76.3	65	C:GO:0000159; P:GO:0000184; P:GO:0000188; C:GO:0000775; C:GO:0005618; C:GO:0005635; C:GO:0005654; C:GO:0005739; C:GO:0005813; C:GO:0005814; C:GO:0005826; C:GO:0005829; C:GO:0005934; C:GO:0005935; P:GO:0006275; P:GO:0006355; P:GO:0006417; P:GO:0006672; P:GO:0006914; P:GO:0007084; P:GO:0007094; P:GO:0007099; P:GO:0007143; P:GO:0007623; P:GO:0008380; P:GO:0009792; P:GO:0009926; P:GO:0010389; C:GO:00…	C:protein phosphatase type 2A complex; P:nuclear-transcribed mRNA catabolic process, nonsense-mediated decay; P:inactivation of MAPK activity; C:chromosome, centromeric region; C:cell wall; C:nuclear envelope; C:nucleoplasm; C:mitochondrion; C:centrosome; C:centriole; C:actomyosin contractile ring; C:cytosol; C:cellular bud tip; C:cellular bud neck; P:regulation of DNA replication; P:regulation o…	EC:3.1.3.16	Protein-serine/threonine phosphatase	IPR000357 (PFAM); PF13646 (PFAM); IPR011989 (G3DSA:1.25.10.GENE3D); PTHR10648 (PANTHER); PTHR10648:SF9 (PANTHER); IPR021133 (PROSITE_PROFILES); IPR021133 (PROSITE_PROFILES); IPR021133 (PROSITE_PROFILES); IPR021133 (PROSITE_PROFILES); IPR021133 (PROSITE_PROFILES); IPR021133 (PROSITE_PROFILES); IPR021133 (PROSITE_PROFILES); IPR021133 (PROSITE_PROFILES); IPR021133 (PROSITE_PROFILES); IPR021133 (PROS…	F:GO:0005515	F:protein binding
TRINITY_DN3228_c0_g1_i3	AIF1L	RecName: Full=Allograft inflammatory factor 1-like; AltName: Full=Ionized calcium-binding adapter molecule 2 [Mus musculus]	2629	18	1.68905e-70	74.35	44	P:GO:0001774; C:GO:0001891; P:GO:0001934; F:GO:0005509; C:GO:0005634; C:GO:0005829; C:GO:0005884; C:GO:0005925; P:GO:0006911; P:GO:0010629; P:GO:0014739; P:GO:0016601; P:GO:0021549; C:GO:0030027; P:GO:0030041; P:GO:0030046; P:GO:0031668; C:GO:0032587; P:GO:0032870; C:GO:0032991; P:GO:0042102; P:GO:0043066; C:GO:0043204; P:GO:0045429; C:GO:0048471; P:GO:0048661; P:GO:0048662; P:GO:0048678; F:GO:00…	P:microglial cell activation; C:phagocytic cup; P:positive regulation of protein phosphorylation; F:calcium ion binding; C:nucleus; C:cytosol; C:actin filament; C:focal adhesion; P:phagocytosis, engulfment; P:negative regulation of gene expression; P:positive regulation of muscle hyperplasia; P:Rac protein signal transduction; P:cerebellum development; C:lamellipodium; P:actin filament polymeriza…			G3DSA:1.10.238.10 (GENE3D); mobidb-lite (MOBIDB_LITE); IPR042433 (PANTHER); IPR028453 (PTHR10356:PANTHER); IPR002048 (PROSITE_PROFILES); IPR011992 (SUPERFAMILY)	F:GO:0005509; F:GO:0051015	F:calcium ion binding; F:actin filament binding
TRINITY_DN3352_c0_g1_i1	INSYN1	RecName: Full=Inhibitory synaptic factor 1; Short=InSyn1	2977	8	1.01278e-104	61.91	5	F:GO:0005515; C:GO:0014069; C:GO:0030054; C:GO:0045211; P:GO:0060080	F:protein binding; C:postsynaptic density; C:cell junction; C:postsynaptic membrane; P:inhibitory postsynaptic potential			IPR027997 (PFAM); mobidb-lite (MOBIDB_LITE); mobidb-lite (MOBIDB_LITE); mobidb-lite (MOBIDB_LITE); mobidb-lite (MOBIDB_LITE); mobidb-lite (MOBIDB_LITE); mobidb-lite (MOBIDB_LITE); mobidb-lite (MOBIDB_LITE); mobidb-lite (MOBIDB_LITE); mobidb-lite (MOBIDB_LITE); PTHR15917:SF3 (PANTHER); IPR027997 (PANTHER)	no GO terms	no GO terms
TRINITY_DN369_c1_g1_i1	ACVR2A	Pygocentrus nattereri activin A receptor type 2A (acvr2a), mRNA	986	20	1.78438e-21	77.63	11	P:GO:0001755; F:GO:0005524; P:GO:0006468; P:GO:0007179; F:GO:0017002; P:GO:0030902; P:GO:0032924; F:GO:0046872; C:GO:0048179; F:GO:0048185; P:GO:0051216	P:neural crest cell migration; F:ATP binding; P:protein phosphorylation; P:transforming growth factor beta receptor signaling pathway; F:activin-activated receptor activity; P:hindbrain development; P:activin receptor signaling pathway; F:metal ion binding; C:activin receptor complex; F:activin binding; P:cartilage development			no IPS match	no IPS match	no IPS match
TRINITY_DN4270_c0_g1_i2	CLTC	Pygocentrus nattereri clathrin heavy chain 1 (LOC108443353), transcript variant X4, mRNA	925	20	0	83.91	15	F:GO:0000166; P:GO:0000278; P:GO:0000398; F:GO:0003723; F:GO:0005198; C:GO:0005819; P:GO:0006886; P:GO:0006898; F:GO:0016787; C:GO:0030130; C:GO:0030132; F:GO:0032051; C:GO:0045334; P:GO:0048268; C:GO:0071439	F:nucleotide binding; P:mitotic cell cycle; P:mRNA splicing, via spliceosome; F:RNA binding; F:structural molecule activity; C:spindle; P:intracellular protein transport; P:receptor-mediated endocytosis; F:hydrolase activity; C:clathrin coat of trans-Golgi network vesicle; C:clathrin coat of coated pit; F:clathrin light chain binding; C:clathrin-coated endocytic vesicle; P:clathrin coat assembly;…			no IPS match	no IPS match	no IPS match
TRINITY_DN4455_c0_g1_i7	UNKNOWN		563									no IPS match	no IPS match	no IPS match
TRINITY_DN4479_c0_g1_i1	SRSF1	RecName: Full=Serine/arginine-rich splicing factor 1; AltName: Full=Splicing factor, arginine/serine-rich 1	2536	20	1.58343e-41	78.45	35	P:GO:0000381; P:GO:0000395; F:GO:0001069; P:GO:0001701; P:GO:0002119; P:GO:0002244; C:GO:0005730; C:GO:0005829; P:GO:0006406; P:GO:0007283; F:GO:0008143; P:GO:0008406; P:GO:0010837; C:GO:0016021; C:GO:0016607; P:GO:0031124; P:GO:0032869; P:GO:0033120; C:GO:0035061; C:GO:0035145; F:GO:0036002; P:GO:0040009; F:GO:0043422; F:GO:0044547; P:GO:0045617; P:GO:0048025; F:GO:0050733; P:GO:0051726; P:GO:00…	P:regulation of alternative mRNA splicing, via spliceosome; P:mRNA 5'-splice site recognition; F:regulatory region RNA binding; P:in utero embryonic development; P:nematode larval development; P:hematopoietic progenitor cell differentiation; C:nucleolus; C:cytosol; P:mRNA export from nucleus; P:spermatogenesis; F:poly(A) binding; P:gonad development; P:regulation of keratinocyte proliferation; C:…			IPR000504 (SMART); IPR000504 (PFAM); IPR012677 (G3DSA:3.30.70.GENE3D); mobidb-lite (MOBIDB_LITE); mobidb-lite (MOBIDB_LITE); mobidb-lite (MOBIDB_LITE); mobidb-lite (MOBIDB_LITE); mobidb-lite (MOBIDB_LITE); mobidb-lite (MOBIDB_LITE); PTHR23147:SF82 (PANTHER); PTHR23147 (PANTHER); IPR000504 (PROSITE_PROFILES); cd12600 (CDD); IPR035979 (SUPERFAMILY)	F:GO:0003676	F:nucleic acid binding
TRINITY_DN5500_c0_g1_i1	ARHGEF12	Pygocentrus nattereri rho guanine nucleotide exchange factor 12-like (LOC108428619), transcript variant X5, mRNA	7780	20	0	81.6	3	F:GO:0005089; C:GO:0005737; P:GO:0035023	F:Rho guanyl-nucleotide exchange factor activity; C:cytoplasm; P:regulation of Rho protein signal transduction			IPR001849 (SMART); IPR001478 (SMART); IPR000219 (SMART); G3DSA:2.30.42.10 (GENE3D); IPR041020 (PFAM); IPR041489 (PFAM); G3DSA:1.20.58.1850 (GENE3D); IPR035899 (G3DSA:1.20.900.GENE3D); IPR011993 (G3DSA:2.30.29.GENE3D); IPR015212 (PFAM); IPR000219 (PFAM); mobidb-lite (MOBIDB_LITE); mobidb-lite (MOBIDB_LITE); mobidb-lite (MOBIDB_LITE); mobidb-lite (MOBIDB_LITE); mobidb-lite (MOBIDB_LITE); mobidb-lit…	F:GO:0005085; F:GO:0005089; F:GO:0005515; C:GO:0005737; P:GO:0007186; P:GO:0007266	F:guanyl-nucleotide exchange factor activity; F:Rho guanyl-nucleotide exchange factor activity; F:protein binding; C:cytoplasm; P:G protein-coupled receptor signaling pathway; P:Rho protein signal transduction
TRINITY_DN5647_c0_g1_i7	RYR2	Ryanodine receptor 2 isoform X9	16236	20	0	88.55	11	F:GO:0005219; F:GO:0005509; C:GO:0005790; P:GO:0007224; C:GO:0030018; C:GO:0030659; C:GO:0033017; C:GO:0034704; C:GO:0042383; F:GO:0048763; P:GO:0051209	F:ryanodine-sensitive calcium-release channel activity; F:calcium ion binding; C:smooth endoplasmic reticulum; P:smoothened signaling pathway; C:Z disc; C:cytoplasmic vesicle membrane; C:sarcoplasmic reticulum membrane; C:calcium channel complex; C:sarcolemma; F:calcium-induced calcium release activity; P:release of sequestered calcium ion into cytosol			IPR013333 (PRINTS); IPR016093 (SMART); IPR003877 (SMART); G3DSA:2.60.120.920 (GENE3D); G3DSA:2.80.10.50 (GENE3D); G3DSA:1.25.10.120 (GENE3D); IPR000699 (PFAM); G3DSA:2.60.120.920 (GENE3D); G3DSA:2.60.120.920 (GENE3D); IPR003032 (PFAM); IPR014821 (PFAM); IPR013662 (PFAM); G3DSA:1.10.238.10 (GENE3D); IPR005821 (PFAM); IPR009460 (PFAM); G3DSA:1.10.490.160 (GENE3D); G3DSA:2.80.10.50 (GENE3D); IPR0038…	F:GO:0005216; F:GO:0005219; F:GO:0005262; F:GO:0005509; F:GO:0005515; P:GO:0006811; P:GO:0006816; P:GO:0006874; C:GO:0016020; C:GO:0016021; P:GO:0055085; P:GO:0070588	F:ion channel activity; F:ryanodine-sensitive calcium-release channel activity; F:calcium channel activity; F:calcium ion binding; F:protein binding; P:ion transport; P:calcium ion transport; P:cellular calcium ion homeostasis; C:membrane; C:integral component of membrane; P:transmembrane transport; P:calcium ion transmembrane transport
TRINITY_DN5984_c0_g1_i4	ANK3	RecName: Full=Ankyrin-3; Short=ANK-3; AltName: Full=Ankyrin-G	9783	20	0	59.8	62	C:GO:0000785; P:GO:0001955; P:GO:0002027; F:GO:0003682; F:GO:0003723; C:GO:0005654; C:GO:0005768; C:GO:0005856; C:GO:0005911; P:GO:0006275; P:GO:0006357; P:GO:0006935; P:GO:0007009; P:GO:0007010; P:GO:0007492; F:GO:0008092; P:GO:0010604; P:GO:0010882; C:GO:0016021; P:GO:0016032; P:GO:0016192; C:GO:0016323; F:GO:0019899; F:GO:0030674; P:GO:0031647; C:GO:0031672; C:GO:0031965; P:GO:0032414; P:GO:00…	C:chromatin; P:blood vessel maturation; P:regulation of heart rate; F:chromatin binding; F:RNA binding; C:nucleoplasm; C:endosome; C:cytoskeleton; C:cell-cell junction; P:regulation of DNA replication; P:regulation of transcription by RNA polymerase II; P:chemotaxis; P:plasma membrane organization; P:cytoskeleton organization; P:endoderm development; F:cytoskeletal protein binding; P:positive reg…			IPR002110 (PRINTS); IPR004087 (SMART); IPR002110 (SMART); IPR024600 (SMART); IPR004088 (PFAM); IPR024600 (PFAM); IPR036770 (G3DSA:1.25.40.GENE3D); IPR036612 (G3DSA:3.30.1370.GENE3D); IPR036770 (G3DSA:1.25.40.GENE3D); IPR036770 (G3DSA:1.25.40.GENE3D); IPR020683 (PFAM); IPR036770 (G3DSA:1.25.40.GENE3D); IPR036770 (G3DSA:1.25.40.GENE3D); IPR036770 (G3DSA:1.25.40.GENE3D); IPR036770 (G3DSA:1.25.40.GEN…	F:GO:0003676; F:GO:0003723; F:GO:0005515	F:nucleic acid binding; F:RNA binding; F:protein binding
TRINITY_DN62068_c0_g1_i2	DENND5B	Pygocentrus nattereri DENN domain containing 5B (dennd5b), transcript variant X7, mRNA	219	8	3.22065e-73	93.44	2	C:GO:0016021; F:GO:0017112	C:integral component of membrane; F:Rab guanyl-nucleotide exchange factor activity			no IPS match	no IPS match	no IPS match
TRINITY_DN76_c1_g1_i1	SLC38A3	Astyanax mexicanus sodium-coupled neutral amino acid transporter 3 (LOC103042420), mRNA	2518	20	2.95786e-36	78.75	3	P:GO:0003333; C:GO:0005887; F:GO:0015171	P:amino acid transmembrane transport; C:integral component of plasma membrane; F:amino acid transmembrane transporter activity			no IPS match	no IPS match	no IPS match
TRINITY_DN8509_c0_g1_i7	MTMR2	RecName: Full=Myotubularin-related protein 2; AltName: Full=Phosphatidylinositol-3,5-bisphosphate 3-phosphatase; AltName: Full=Phosphatidylinositol-3-phosphate phosphatase	6585	20	0	55.51	33	P:GO:0001558; F:GO:0001691; F:GO:0004438; F:GO:0004725; C:GO:0005774; C:GO:0005789; C:GO:0005829; P:GO:0006470; P:GO:0006661; P:GO:0006914; P:GO:0007283; F:GO:0008138; P:GO:0009966; C:GO:0016021; C:GO:0016604; F:GO:0017112; F:GO:0019902; P:GO:0031323; P:GO:0031645; C:GO:0031901; F:GO:0035091; P:GO:0042552; C:GO:0043005; P:GO:0043086; P:GO:0043087; C:GO:0045202; P:GO:0046856; C:GO:0048471; P:GO:00…	P:regulation of cell growth; F:pseudophosphatase activity; F:phosphatidylinositol-3-phosphatase activity; F:protein tyrosine phosphatase activity; C:vacuolar membrane; C:endoplasmic reticulum membrane; C:cytosol; P:protein dephosphorylation; P:phosphatidylinositol biosynthetic process; P:autophagy; P:spermatogenesis; F:protein tyrosine/serine/threonine phosphatase activity; P:regulation of signal…	EC:3.1.3.16	Protein-serine/threonine phosphatase	IPR004182 (SMART); IPR001194 (SMART); IPR005113 (SMART); IPR001849 (SMART); IPR005112 (SMART); IPR011993 (G3DSA:2.30.29.GENE3D); IPR001849 (PFAM); IPR001194 (PFAM); IPR005113 (PFAM); IPR022096 (PFAM); IPR010569 (PFAM); IPR004182 (PFAM); G3DSA:3.30.450.200 (GENE3D); G3DSA:3.40.50.11500 (GENE3D); mobidb-lite (MOBIDB_LITE); mobidb-lite (MOBIDB_LITE); mobidb-lite (MOBIDB_LITE); IPR030564 (PANTHER); I…	F:GO:0019208; P:GO:0043087	F:phosphatase regulator activity; P:regulation of GTPase activity
TRINITY_DN9782_c0_g1_i4	PPM1H	Pygocentrus nattereri protein phosphatase 1H-like (LOC108429443), transcript variant X2, mRNA	2203	20	0	79.6	5	F:GO:0004724; F:GO:0004741; C:GO:0005634; C:GO:0005739; P:GO:1904184	F:magnesium-dependent protein serine/threonine phosphatase activity; F:[pyruvate dehydrogenase (lipoamide)] phosphatase activity; C:nucleus; C:mitochondrion; P:positive regulation of pyruvate dehydrogenase activity	EC:3.1.3.16; EC:3.1.3.43	Protein-serine/threonine phosphatase; [Pyruvate dehydrogenase (acetyl-transferring)]-phosphatase	IPR001932 (SMART); IPR001932 (PFAM); mobidb-lite (MOBIDB_LITE); PTHR13832:SF287 (PANTHER); IPR015655 (PANTHER); IPR001932 (PROSITE_PROFILES); IPR001932 (CDD); IPR036457 (SUPERFAMILY)	F:GO:0003824; F:GO:0004722; P:GO:0006470	F:catalytic activity; F:protein serine/threonine phosphatase activity; P:protein dephosphorylation

## Sheet: EE.Up-DTE
SeqName	Gene	Description	Length	#Hits	e-Value	sim mean	#GO	GO IDs	GO Names	Enzyme Codes	Enzyme Names	InterPro IDs	InterPro GO IDs	InterPro GO Names
TRINITY_DN10261_c0_g1_i14	MAPKBP1	MAPKBP1 - Pygocentrus nattereri mitogen-activated protein kinase binding protein 1 (mapkbp1), transcript variant X4, mRNA	7281	20	0	82.1	12	F:GO:0005515; C:GO:0005654; C:GO:0005730; C:GO:0005737; P:GO:0007052; P:GO:0007256; F:GO:0016301; P:GO:0022008; P:GO:0043124; C:GO:0097431; P:GO:1900425; P:GO:2000483	F:protein binding; C:nucleoplasm; C:nucleolus; C:cytoplasm; P:mitotic spindle organization; P:activation of JNKK activity; F:kinase activity; P:neurogenesis; P:negative regulation of I-kappaB kinase/NF-kappaB signaling; C:mitotic spindle pole; P:negative regulation of defense response to bacterium; P:negative regulation of interleukin-8 secretion			IPR001680 (SMART); IPR001680 (PFAM); IPR024977 (PFAM); IPR015943 (G3DSA:2.130.10.GENE3D); IPR015943 (G3DSA:2.130.10.GENE3D); IPR015943 (G3DSA:2.130.10.GENE3D); IPR015943 (G3DSA:2.130.10.GENE3D); mobidb-lite (MOBIDB_LITE); mobidb-lite (MOBIDB_LITE); mobidb-lite (MOBIDB_LITE); mobidb-lite (MOBIDB_LITE); mobidb-lite (MOBIDB_LITE); mobidb-lite (MOBIDB_LITE); mobidb-lite (MOBIDB_LITE); mobidb-lite (MO…	F:GO:0005515	F:protein binding
TRINITY_DN1069_c0_g1_i4	CTDSP2	CTDSP2 - carboxy-terminal domain RNA polymerase II polypeptide A small phosphatase 2-like	1089	8	0.0002595	55.01	4	C:GO:0005575; P:GO:0006357; F:GO:0008420; P:GO:0030182	C:cellular_component; P:regulation of transcription by RNA polymerase II; F:RNA polymerase II CTD heptapeptide repeat phosphatase activity; P:neuron differentiation			mobidb-lite (MOBIDB_LITE); mobidb-lite (MOBIDB_LITE)	no GO terms	no GO terms
TRINITY_DN10753_c0_g1_i1	CD46	CD46 - Pygocentrus nattereri membrane cofactor protein-like (LOC108425583), transcript variant X8, mRNA	862	20	2.30065e-133	83.53	2	C:GO:0005840; F:GO:0016787	C:ribosome; F:hydrolase activity			no IPS match	no IPS match	no IPS match
TRINITY_DN11833_c0_g1_i1	PLCH1	PLCH1 - Astyanax mexicanus phospholipase C eta 1 (plch1), mRNA	749	20	1.4302e-141	75.28	11	F:GO:0004435; F:GO:0005507; F:GO:0005509; C:GO:0005886; F:GO:0008131; P:GO:0009308; P:GO:0016042; P:GO:0032959; P:GO:0048015; F:GO:0050429; P:GO:0051209	F:phosphatidylinositol phospholipase C activity; F:copper ion binding; F:calcium ion binding; C:plasma membrane; F:primary amine oxidase activity; P:amine metabolic process; P:lipid catabolic process; P:inositol trisphosphate biosynthetic process; P:phosphatidylinositol-mediated signaling; F:calcium-dependent phospholipase C activity; P:release of sequestered calcium ion into cytosol			no IPS match	no IPS match	no IPS match
TRINITY_DN11964_c0_g1_i1	FAM104A	FAM104A - Pygocentrus nattereri protein FAM104A-like (LOC108437143), mRNA	1860	20	0	77.32	3	F:GO:0005515; C:GO:0005575; P:GO:0008150	F:protein binding; C:cellular_component; P:biological_process			no IPS match	no IPS match	no IPS match
TRINITY_DN1429_c0_g1_i1	WNK4	WNK4 - RecName: Full=Serine/threonine-protein kinase WNK4; AltName: Full=Protein kinase lysine-deficient 4; AltName: Full=Protein kinase with no lysine 4	8016	20	0	80.06	54	P:GO:0000122; F:GO:0000287; P:GO:0003084; F:GO:0004674; F:GO:0005524; C:GO:0005623; C:GO:0005634; C:GO:0005829; C:GO:0005886; C:GO:0005912; C:GO:0005923; P:GO:0006821; P:GO:0008285; P:GO:0009911; P:GO:0010766; P:GO:0010800; P:GO:0010820; P:GO:0010923; P:GO:0018105; F:GO:0019869; F:GO:0019870; F:GO:0019901; F:GO:0019902; P:GO:0023016; F:GO:0030291; F:GO:0030295; P:GO:0030644; P:GO:0032147; P:GO:00…	P:negative regulation of transcription by RNA polymerase II; F:magnesium ion binding; P:positive regulation of systemic arterial blood pressure; F:protein serine/threonine kinase activity; F:ATP binding; C:cell; C:nucleus; C:cytosol; C:plasma membrane; C:adherens junction; C:bicellular tight junction; P:chloride transport; P:negative regulation of cell population proliferation; P:positive regulat…	EC:2.7.11	Transferring phosphorus-containing groups	IPR000719 (SMART); G3DSA:3.30.200.20 (GENE3D); IPR000719 (PFAM); G3DSA:1.10.510.10 (GENE3D); G3DSA:3.10.20.90 (GENE3D); IPR024678 (PFAM); mobidb-lite (MOBIDB_LITE); mobidb-lite (MOBIDB_LITE); mobidb-lite (MOBIDB_LITE); mobidb-lite (MOBIDB_LITE); mobidb-lite (MOBIDB_LITE); mobidb-lite (MOBIDB_LITE); mobidb-lite (MOBIDB_LITE); mobidb-lite (MOBIDB_LITE); mobidb-lite (MOBIDB_LITE); mobidb-lite (MOBID…	F:GO:0004672; F:GO:0004674; F:GO:0005524; P:GO:0006468	F:protein kinase activity; F:protein serine/threonine kinase activity; F:ATP binding; P:protein phosphorylation
TRINITY_DN14371_c0_g3_i2	KAP114	KAP114 - RecName: Full=Importin subunit beta-5; AltName: Full=114 kDa karyopherin; AltName: Full=Karyopherin subunit beta-5; AltName: Full=Karyopherin-114	4226	4	0	70.67	8	C:GO:0005635; C:GO:0005829; P:GO:0006606; F:GO:0008536; P:GO:0042254; F:GO:0042393; P:GO:0050821; F:GO:0061608	C:nuclear envelope; C:cytosol; P:protein import into nucleus; F:Ran GTPase binding; P:ribosome biogenesis; F:histone binding; P:protein stabilization; F:nuclear import signal receptor activity			IPR001494 (SMART); IPR001494 (PFAM); mobidb-lite (MOBIDB_LITE); mobidb-lite (MOBIDB_LITE); PTHR10997 (PANTHER); PTHR10997:SF9 (PANTHER); IPR001494 (PROSITE_PROFILES); IPR016024 (SUPERFAMILY)	P:GO:0006886; F:GO:0008536	P:intracellular protein transport; F:Ran GTPase binding
TRINITY_DN15301_c0_g1_i4	RBM4B	RBM4B - Pygocentrus nattereri RNA-binding protein 4B-like (LOC108428046), transcript variant X3, mRNA	3407	20	0	84.46	13	P:GO:0000381; F:GO:0003729; F:GO:0005515; C:GO:0005730; C:GO:0005829; P:GO:0006417; F:GO:0008270; P:GO:0010628; C:GO:0016607; P:GO:0032922; C:GO:0032991; P:GO:0043153; P:GO:0045292	P:regulation of alternative mRNA splicing, via spliceosome; F:mRNA binding; F:protein binding; C:nucleolus; C:cytosol; P:regulation of translation; F:zinc ion binding; P:positive regulation of gene expression; C:nuclear speck; P:circadian regulation of gene expression; C:protein-containing complex; P:entrainment of circadian clock by photoperiod; P:mRNA cis splicing, via spliceosome			no IPS match	no IPS match	no IPS match
TRINITY_DN153536_c0_g1_i1	RPL24	RPL24 - Pygocentrus nattereri ribosomal protein L24 (rpl24), mRNA	361	17	1.64702e-16	85.52	8	P:GO:0000027; F:GO:0003723; F:GO:0003735; P:GO:0006412; F:GO:0016787; C:GO:0022625; P:GO:0043009; P:GO:1902626	P:ribosomal large subunit assembly; F:RNA binding; F:structural constituent of ribosome; P:translation; F:hydrolase activity; C:cytosolic large ribosomal subunit; P:chordate embryonic development; P:assembly of large subunit precursor of preribosome			PS51257 (PROSITE_PROFILES)	no GO terms	no GO terms
TRINITY_DN16731_c0_g1_i5	odhA	odhA - RecName: Full=2-oxoglutarate dehydrogenase E1 component; AltName: Full=Alpha-ketoglutarate dehydrogenase	4951	20	0	68.02	8	P:GO:0002244; F:GO:0004591; C:GO:0005759; C:GO:0005829; P:GO:0006096; P:GO:0006099; F:GO:0030976; C:GO:0045252	P:hematopoietic progenitor cell differentiation; F:oxoglutarate dehydrogenase (succinyl-transferring) activity; C:mitochondrial matrix; C:cytosol; P:glycolytic process; P:tricarboxylic acid cycle; F:thiamine pyrophosphate binding; C:oxoglutarate dehydrogenase complex	EC:1.2.4.2	Oxoglutarate dehydrogenase (succinyl-transferring)	IPR005475 (SMART); IPR042179 (G3DSA:3.40.50.GENE3D); IPR005475 (PFAM); IPR031717 (PFAM); IPR001017 (PFAM); G3DSA:3.40.50.970 (GENE3D); G3DSA:3.40.50.12470 (GENE3D); IPR011603 (PANTHER); PTHR23152:SF21 (PANTHER); IPR029061 (SUPERFAMILY); IPR029061 (SUPERFAMILY)	F:GO:0004591; P:GO:0006099; F:GO:0016624; F:GO:0030976; P:GO:0055114	F:oxoglutarate dehydrogenase (succinyl-transferring) activity; P:tricarboxylic acid cycle; F:oxidoreductase activity, acting on the aldehyde or oxo group of donors, disulfide as acceptor; F:thiamine pyrophosphate binding; P:oxidation-reduction process
TRINITY_DN1866_c0_g1_i11	PPP4R4	PPP4R4 - Pygocentrus nattereri protein phosphatase 4 regulatory subunit 4 (ppp4r4), transcript variant X4, mRNA	5988	20	0	87.8	5	C:GO:0005829; C:GO:0008287; F:GO:0019888; P:GO:0032515; P:GO:0080163	C:cytosol; C:protein serine/threonine phosphatase complex; F:protein phosphatase regulator activity; P:negative regulation of phosphoprotein phosphatase activity; P:regulation of protein serine/threonine phosphatase activity			IPR011989 (G3DSA:1.25.10.GENE3D); mobidb-lite (MOBIDB_LITE); mobidb-lite (MOBIDB_LITE); mobidb-lite (MOBIDB_LITE); mobidb-lite (MOBIDB_LITE); mobidb-lite (MOBIDB_LITE); mobidb-lite (MOBIDB_LITE); mobidb-lite (MOBIDB_LITE); IPR039918 (PANTHER); IPR021133 (PROSITE_PROFILES); IPR021133 (PROSITE_PROFILES); IPR016024 (SUPERFAMILY)	no GO terms	no GO terms
TRINITY_DN191_c1_g1_i1	PPP3R1	PPP3R1 - RecName: Full=Calcineurin subunit B; AltName: Full=Calcineurin regulatory subunit; AltName: Full=Protein phosphatase 2B regulatory subunit	1960	20	1.8685e-82	84.35	72	C:GO:0000139; P:GO:0000754; P:GO:0001569; P:GO:0001578; P:GO:0001837; F:GO:0005509; F:GO:0005516; C:GO:0005623; C:GO:0005654; C:GO:0005739; C:GO:0005783; C:GO:0005829; C:GO:0005955; P:GO:0005977; P:GO:0006402; P:GO:0006469; P:GO:0006606; P:GO:0006611; P:GO:0006873; P:GO:0006952; P:GO:0007223; P:GO:0007269; P:GO:0007321; P:GO:0007507; F:GO:0008017; C:GO:0008021; F:GO:0008597; P:GO:0009405; C:GO:00…	C:Golgi membrane; P:adaptation of signaling pathway by response to pheromone involved in conjugation with cellular fusion; P:branching involved in blood vessel morphogenesis; P:microtubule bundle formation; P:epithelial to mesenchymal transition; F:calcium ion binding; F:calmodulin binding; C:cell; C:nucleoplasm; C:mitochondrion; C:endoplasmic reticulum; C:cytosol; C:calcineurin complex; P:glycog…	EC:3.1.3.16	Protein-serine/threonine phosphatase	PR01697 (PRINTS); IPR002048 (SMART); IPR002048 (PFAM); G3DSA:1.10.238.10 (GENE3D); IPR002048 (PFAM); PTHR45942:SF3 (PANTHER); PTHR45942 (PANTHER); IPR002048 (PROSITE_PROFILES); IPR002048 (PROSITE_PROFILES); IPR002048 (PROSITE_PROFILES); IPR002048 (CDD); IPR011992 (SUPERFAMILY)	F:GO:0005509	F:calcium ion binding
TRINITY_DN20461_c0_g1_i5	NTM	NTM - Pygocentrus nattereri neurotrimin-like (LOC108423783), transcript variant X3, mRNA	2805	20	0	84.99	11	C:GO:0005634; C:GO:0005737; P:GO:0007051; P:GO:0007059; P:GO:0018013; P:GO:0018016; P:GO:0035572; P:GO:0035573; F:GO:0042054; F:GO:0042802; F:GO:0071885	C:nucleus; C:cytoplasm; P:spindle organization; P:chromosome segregation; P:N-terminal peptidyl-glycine methylation; P:N-terminal peptidyl-proline dimethylation; P:N-terminal peptidyl-serine dimethylation; P:N-terminal peptidyl-serine trimethylation; F:histone methyltransferase activity; F:identical protein binding; F:N-terminal protein N-methyltransferase activity			IPR003599 (SMART); IPR003598 (SMART); PIRSF000615 (PIRSF); IPR013106 (PFAM); IPR013783 (G3DSA:2.60.40.GENE3D); PF13927 (PFAM); IPR013783 (G3DSA:2.60.40.GENE3D); IPR013783 (G3DSA:2.60.40.GENE3D); PTHR42757 (PANTHER); PTHR42757:SF36 (PANTHER); IPR007110 (PROSITE_PROFILES); IPR007110 (PROSITE_PROFILES); IPR007110 (PROSITE_PROFILES); cd00096 (CDD); IPR036179 (SUPERFAMILY); IPR036179 (SUPERFAMILY); IP…	no GO terms	no GO terms
TRINITY_DN25318_c0_g1_i1	NEUROD1	NEUROD1 - Pygocentrus nattereri neuronal differentiation 1 (neurod1), transcript variant X2, mRNA	237	3	1.71709e-64	91.53	11	F:GO:0003677; C:GO:0005634; C:GO:0005737; P:GO:0006355; P:GO:0031018; P:GO:0031099; P:GO:0042051; P:GO:0045746; F:GO:0046983; P:GO:0048923; P:GO:0060119	F:DNA binding; C:nucleus; C:cytoplasm; P:regulation of transcription, DNA-templated; P:endocrine pancreas development; P:regeneration; P:compound eye photoreceptor development; P:negative regulation of Notch signaling pathway; F:protein dimerization activity; P:posterior lateral line neuromast hair cell differentiation; P:inner ear receptor cell development			no IPS match	no IPS match	no IPS match
TRINITY_DN26984_c0_g1_i4	RALY	RALY - Pygocentrus nattereri RALY heterogeneous nuclear ribonucleoprotein (raly), transcript variant X2, mRNA	1487	20	0	82.64	2	F:GO:0003723; C:GO:0005634	F:RNA binding; C:nucleus			IPR000504 (SMART); IPR017347 (PIRSF); IPR012677 (G3DSA:3.30.70.GENE3D); IPR000504 (PFAM); mobidb-lite (MOBIDB_LITE); mobidb-lite (MOBIDB_LITE); PTHR13968 (PANTHER); PTHR13968:SF6 (PANTHER); IPR000504 (PROSITE_PROFILES); IPR034502 (CDD); IPR035979 (SUPERFAMILY)	F:GO:0003676	F:nucleic acid binding
TRINITY_DN28535_c0_g1_i10	GLRX	GLRX - RecName: Full=Glutaredoxin-1; AltName: Full=Thioltransferase-1; Short=TTase-1	3411	13	3.34843e-06	56.52	5	C:GO:0005575; F:GO:0009055; F:GO:0015035; F:GO:0016740; P:GO:0045454	C:cellular_component; F:electron transfer activity; F:protein disulfide oxidoreductase activity; F:transferase activity; P:cell redox homeostasis			IPR014025 (PRINTS); IPR036249 (G3DSA:3.40.30.GENE3D); IPR002109 (PFAM); mobidb-lite (MOBIDB_LITE); PTHR46361 (PANTHER); PTHR46361:SF5 (PANTHER); IPR002109 (PROSITE_PROFILES); cd04371 (CDD); IPR036249 (SUPERFAMILY)	F:GO:0009055; F:GO:0015035; P:GO:0045454	F:electron transfer activity; F:protein disulfide oxidoreductase activity; P:cell redox homeostasis
TRINITY_DN297_c1_g1_i6	TAP2	TAP2 - antigen peptide transporter 2-like	2689	20	0	86.47	13	F:GO:0005524; C:GO:0005765; F:GO:0015433; P:GO:0015833; F:GO:0016887; P:GO:0019885; F:GO:0042288; C:GO:0042825; P:GO:0046686; F:GO:0046978; F:GO:0046979; P:GO:0051597; P:GO:0055085	F:ATP binding; C:lysosomal membrane; F:ATPase-coupled peptide antigen transmembrane transporter activity; P:peptide transport; F:ATPase activity; P:antigen processing and presentation of endogenous peptide antigen via MHC class I; F:MHC class I protein binding; C:TAP complex; P:response to cadmium ion; F:TAP1 binding; F:TAP2 binding; P:response to methylmercury; P:transmembrane transport	EC:3.6.1.3; EC:7.4.2.5; EC:3.6.1.15	Adenosinetriphosphatase; n/a; Nucleoside-triphosphate phosphatase	IPR003593 (SMART); IPR011527 (PFAM); G3DSA:3.40.50.300 (GENE3D); IPR036640 (G3DSA:1.20.1560.GENE3D); PIRSF002773 (PIRSF); IPR003439 (PFAM); PTHR24221:SF273 (PANTHER); IPR039421 (PANTHER); IPR011527 (PROSITE_PROFILES); IPR003439 (PROSITE_PROFILES); cd18590 (CDD); IPR036640 (SUPERFAMILY); IPR027417 (SUPERFAMILY)	F:GO:0005524; C:GO:0016021; F:GO:0016887; F:GO:0042626; P:GO:0055085	F:ATP binding; C:integral component of membrane; F:ATPase activity; F:ATPase-coupled transmembrane transporter activity; P:transmembrane transport
TRINITY_DN3096_c0_g1_i3	ATP5M	ATP5M - RecName: Full=ATP synthase subunit g, mitochondrial; Short=ATPase subunit g; AltName: Full=ATP synthase membrane subunit g	604	6	8.68541e-28	80.5	10	C:GO:0000276; P:GO:0001666; F:GO:0005515; F:GO:0008289; F:GO:0008553; C:GO:0016021; F:GO:0016887; P:GO:0042407; P:GO:0042776; F:GO:0046933	C:mitochondrial proton-transporting ATP synthase complex, coupling factor F(o); P:response to hypoxia; F:protein binding; F:lipid binding; F:proton-exporting ATPase activity, phosphorylative mechanism; C:integral component of membrane; F:ATPase activity; P:cristae formation; P:mitochondrial ATP synthesis coupled proton transport; F:proton-transporting ATP synthase activity, rotational mechanism	EC:7.1.3.1; EC:3.6.1.3; EC:7.1.2.1; EC:3.6.1.15	n/a; Adenosinetriphosphatase; n/a; Nucleoside-triphosphate phosphatase	IPR006808 (PFAM); IPR006808 (PANTHER); PTHR12386:SF30 (PANTHER)	C:GO:0000276; F:GO:0015078; P:GO:0015986	C:mitochondrial proton-transporting ATP synthase complex, coupling factor F(o); F:proton transmembrane transporter activity; P:ATP synthesis coupled proton transport
TRINITY_DN311_c0_g1_i4	H1-1	H1-1 - Pygocentrus nattereri histone H1-like (LOC108434264), mRNA	2763	20	0	81.93	6	C:GO:0000786; F:GO:0003677; C:GO:0005576; C:GO:0005634; P:GO:0006334; P:GO:0042742	C:nucleosome; F:DNA binding; C:extracellular region; C:nucleus; P:nucleosome assembly; P:defense response to bacterium			IPR005819 (PRINTS); IPR005818 (SMART); IPR005818 (PFAM); IPR036388 (G3DSA:1.10.10.GENE3D); mobidb-lite (MOBIDB_LITE); mobidb-lite (MOBIDB_LITE); mobidb-lite (MOBIDB_LITE); PTHR11467:SF20 (PANTHER); PTHR11467 (PANTHER); IPR005818 (PROSITE_PROFILES); IPR005818 (CDD); IPR036390 (SUPERFAMILY)	C:GO:0000786; F:GO:0003677; P:GO:0006334; C:GO:0042025	C:nucleosome; F:DNA binding; P:nucleosome assembly; C:host cell nucleus
TRINITY_DN3228_c0_g1_i4	AIF1L	AIF1L - Full=Allograft inflammatory factor 1-like; AltName: Full=Ionized calcium-binding adapter molecule 2 [Mus musculus]	2652	18	1.83505e-70	74.35	44	P:GO:0001774; C:GO:0001891; P:GO:0001934; F:GO:0005509; C:GO:0005634; C:GO:0005829; C:GO:0005884; C:GO:0005925; P:GO:0006911; P:GO:0010629; P:GO:0014739; P:GO:0016601; P:GO:0021549; C:GO:0030027; P:GO:0030041; P:GO:0030046; P:GO:0031668; C:GO:0032587; P:GO:0032870; C:GO:0032991; P:GO:0042102; P:GO:0043066; C:GO:0043204; P:GO:0045429; C:GO:0048471; P:GO:0048661; P:GO:0048662; P:GO:0048678; F:GO:00…	P:microglial cell activation; C:phagocytic cup; P:positive regulation of protein phosphorylation; F:calcium ion binding; C:nucleus; C:cytosol; C:actin filament; C:focal adhesion; P:phagocytosis, engulfment; P:negative regulation of gene expression; P:positive regulation of muscle hyperplasia; P:Rac protein signal transduction; P:cerebellum development; C:lamellipodium; P:actin filament polymeriza…			IPR002048 (PROSITE_PROFILES); IPR011992 (SUPERFAMILY); IPR028453 (PTHR10356:PANTHER); IPR042433 (PANTHER); G3DSA:1.10.238.10 (GENE3D); mobidb-lite (MOBIDB_LITE)	F:GO:0005509; F:GO:0051015	F:calcium ion binding; F:actin filament binding
TRINITY_DN3522_c0_g1_i3	SAPCD1	SAPCD1 - RecName: Full=Suppressor APC domain-containing protein 1; AltName: Full=Protein G7d	3008	4	1.60228e-40	62.35	12	P:GO:0000132; F:GO:0005515; C:GO:0005654; C:GO:0005730; C:GO:0005829; P:GO:0008284; C:GO:0016020; C:GO:0043296; C:GO:0045179; P:GO:0090175; P:GO:0098725; P:GO:1904777	P:establishment of mitotic spindle orientation; F:protein binding; C:nucleoplasm; C:nucleolus; C:cytosol; P:positive regulation of cell population proliferation; C:membrane; C:apical junction complex; C:apical cortex; P:regulation of establishment of planar polarity; P:symmetric cell division; P:negative regulation of protein localization to cell cortex			PF11414 (PFAM); mobidb-lite (MOBIDB_LITE); PTHR14907:SF3 (PANTHER); IPR026828 (PANTHER)	no GO terms	no GO terms
TRINITY_DN4111_c2_g1_i1	TNS1	TNS1 - tensin-like isoform X1	4453	20	0	82.55	2	P:GO:0035556; F:GO:0046872	P:intracellular signal transduction; F:metal ion binding			IPR014020 (SMART); IPR000980 (SMART); IPR003595 (SMART); IPR014020 (PFAM); G3DSA:2.60.40.1110 (GENE3D); IPR036860 (G3DSA:3.30.505.GENE3D); IPR029021 (G3DSA:3.90.190.GENE3D); IPR000980 (PFAM); IPR011993 (G3DSA:2.30.29.GENE3D); mobidb-lite (MOBIDB_LITE); mobidb-lite (MOBIDB_LITE); mobidb-lite (MOBIDB_LITE); mobidb-lite (MOBIDB_LITE); mobidb-lite (MOBIDB_LITE); mobidb-lite (MOBIDB_LITE); mobidb-lite…	no GO terms	no GO terms
TRINITY_DN4642_c0_g1_i11	DPF3	DPF3 - Astyanax mexicanus zinc finger protein DPF3 (LOC103031416), transcript variant X4, mRNA	1281	20	0	80.24	16	C:GO:0000123; F:GO:0004402; F:GO:0005096; P:GO:0006338; P:GO:0007186; P:GO:0007399; F:GO:0008270; C:GO:0016514; P:GO:0016573; P:GO:0035556; F:GO:0042393; P:GO:0043547; P:GO:0045892; P:GO:0045944; P:GO:0055008; C:GO:0071565	C:histone acetyltransferase complex; F:histone acetyltransferase activity; F:GTPase activator activity; P:chromatin remodeling; P:G protein-coupled receptor signaling pathway; P:nervous system development; F:zinc ion binding; C:SWI/SNF complex; P:histone acetylation; P:intracellular signal transduction; F:histone binding; P:positive regulation of GTPase activity; P:negative regulation of transcri…	EC:2.3.1.5; EC:2.3.1.48	Arylamine N-acetyltransferase; Histone acetyltransferase	no IPS match	no IPS match	no IPS match
TRINITY_DN5643_c0_g1_i4	HAPLN1	HAPLN1 - RecName: Full=Hyaluronan and proteoglycan link protein 1; AltName: Full=Cartilage-linking protein 1; Short=Cartilage-link protein; AltName: Full=Proteoglycan link protein; Flags: Precursor	2740	20	6.50997e-156	66.43	17	P:GO:0001501; P:GO:0002040; F:GO:0005540; P:GO:0007155; P:GO:0008065; C:GO:0016020; P:GO:0021766; P:GO:0022008; F:GO:0030021; P:GO:0031101; C:GO:0044304; P:GO:0050794; P:GO:0060074; P:GO:0065008; C:GO:0072534; P:GO:0085029; C:GO:0098978	P:skeletal system development; P:sprouting angiogenesis; F:hyaluronic acid binding; P:cell adhesion; P:establishment of blood-nerve barrier; C:membrane; P:hippocampus development; P:neurogenesis; F:extracellular matrix structural constituent conferring compression resistance; P:fin regeneration; C:main axon; P:regulation of cellular process; P:synapse maturation; P:regulation of biological qualit…			IPR000538 (PRINTS); IPR000538 (SMART); IPR003599 (SMART); IPR013106 (SMART); IPR000538 (PFAM); IPR016186 (G3DSA:3.10.100.GENE3D); IPR013106 (PFAM); IPR013783 (G3DSA:2.60.40.GENE3D); PTHR22804:SF11 (PANTHER); PTHR22804 (PANTHER); IPR000538 (PROSITE_PROFILES); IPR000538 (PROSITE_PROFILES); IPR007110 (PROSITE_PROFILES); cd03519 (CDD); cd05877 (CDD); IPR016187 (SUPERFAMILY); IPR016187 (SUPERFAMILY); …	F:GO:0005540; P:GO:0007155	F:hyaluronic acid binding; P:cell adhesion
TRINITY_DN5961_c0_g1_i3	HDAC4	HDAC4 - RecName: Full=Histone deacetylase 4; Short=HD4	6030	20	0	74.11	151	C:GO:0000118; P:GO:0000209; C:GO:0000790; F:GO:0000978; F:GO:0001085; F:GO:0001226; F:GO:0001227; P:GO:0001570; P:GO:0001755; P:GO:0001975; P:GO:0002076; F:GO:0003714; F:GO:0005080; C:GO:0005667; C:GO:0005771; C:GO:0005794; C:GO:0005829; C:GO:0005881; C:GO:0005901; P:GO:0006338; P:GO:0006342; P:GO:0006515; P:GO:0006954; P:GO:0006974; P:GO:0007026; P:GO:0007043; P:GO:0007507; F:GO:0008013; F:GO:00…	C:histone deacetylase complex; P:protein polyubiquitination; C:nuclear chromatin; F:RNA polymerase II cis-regulatory region sequence-specific DNA binding; F:RNA polymerase II transcription factor binding; F:RNA polymerase II transcription corepressor binding; F:DNA-binding transcription repressor activity, RNA polymerase II-specific; P:vasculogenesis; P:neural crest cell migration; P:response to …	EC:3.5.1.98; EC:3.5.1.48	Histone deacetylase; Acetylspermidine deacetylase	IPR000286 (PRINTS); IPR017320 (PIRSF); IPR023801 (PFAM); IPR037138 (G3DSA:3.40.800.GENE3D); IPR024643 (PFAM); mobidb-lite (MOBIDB_LITE); mobidb-lite (MOBIDB_LITE); mobidb-lite (MOBIDB_LITE); mobidb-lite (MOBIDB_LITE); mobidb-lite (MOBIDB_LITE); mobidb-lite (MOBIDB_LITE); mobidb-lite (MOBIDB_LITE); mobidb-lite (MOBIDB_LITE); IPR033660 (PTHR45364:PANTHER); PTHR45364 (PANTHER); cd10162 (CDD); IPR023…	C:GO:0000118; F:GO:0004407; P:GO:0006325; P:GO:0016575	C:histone deacetylase complex; F:histone deacetylase activity; P:chromatin organization; P:histone deacetylation
TRINITY_DN6168_c0_g1_i3	LARP7	LARP7 - RecName: Full=La-related protein 7; AltName: Full=La ribonucleoprotein domain family member 7	2096	20	7.37127e-113	63.9	20	P:GO:0000122; C:GO:0000791; F:GO:0003729; F:GO:0005515; C:GO:0005654; C:GO:0005829; P:GO:0006409; P:GO:0006417; F:GO:0008098; F:GO:0008266; P:GO:0009891; P:GO:0035562; P:GO:0036093; P:GO:0042780; P:GO:0060043; P:GO:0061026; P:GO:0071045; P:GO:1900087; P:GO:1903608; C:GO:1990904	P:negative regulation of transcription by RNA polymerase II; C:euchromatin; F:mRNA binding; F:protein binding; C:nucleoplasm; C:cytosol; P:tRNA export from nucleus; P:regulation of translation; F:5S rRNA primary transcript binding; F:poly(U) RNA binding; P:positive regulation of biosynthetic process; P:negative regulation of chromatin binding; P:germ cell proliferation; P:tRNA 3'-end processing; …			IPR002344 (PRINTS); IPR000504 (SMART); IPR006630 (SMART); IPR012677 (G3DSA:3.30.70.GENE3D); IPR000504 (PFAM); IPR006630 (PFAM); IPR012677 (G3DSA:3.30.70.GENE3D); IPR014886 (PFAM); IPR036388 (G3DSA:1.10.10.GENE3D); mobidb-lite (MOBIDB_LITE); mobidb-lite (MOBIDB_LITE); mobidb-lite (MOBIDB_LITE); mobidb-lite (MOBIDB_LITE); mobidb-lite (MOBIDB_LITE); mobidb-lite (MOBIDB_LITE); mobidb-lite (MOBIDB_LIT…	F:GO:0003676; F:GO:0003723; C:GO:0005634; P:GO:0006396; C:GO:1990904	F:nucleic acid binding; F:RNA binding; C:nucleus; P:RNA processing; C:ribonucleoprotein complex
TRINITY_DN6285_c0_g1_i5	SNAP25	SNAP25 - RecName: Full=Synaptosomal-associated protein 25; Short=SNAP-25; AltName: Full=Synaptosomal-associated 25 kDa protein	2076	7	4.67259e-10	92.86	58	P:GO:0000281; P:GO:0001504; C:GO:0001917; F:GO:0005249; F:GO:0005484; C:GO:0005768; C:GO:0005802; P:GO:0007409; P:GO:0007616; P:GO:0007626; C:GO:0008021; C:GO:0008076; P:GO:0008306; P:GO:0010975; P:GO:0014047; C:GO:0015629; P:GO:0016081; P:GO:0016082; P:GO:0016197; F:GO:0017022; F:GO:0017075; F:GO:0019904; C:GO:0030027; C:GO:0030054; C:GO:0030175; P:GO:0030252; P:GO:0030431; C:GO:0031083; C:GO:00…	P:mitotic cytokinesis; P:neurotransmitter uptake; C:photoreceptor inner segment; F:voltage-gated potassium channel activity; F:SNAP receptor activity; C:endosome; C:trans-Golgi network; P:axonogenesis; P:long-term memory; P:locomotory behavior; C:synaptic vesicle; C:voltage-gated potassium channel complex; P:associative learning; P:regulation of neuron projection development; P:glutamate secretio…			no IPS match	no IPS match	no IPS match
TRINITY_DN6937_c1_g1_i3	GALNT1	GALNT1- RecName: Full=Polypeptide N-acetylgalactosaminyltransferase 1; AltName: Full=Polypeptide GalNAc transferase 1; Short=GalNAc-T1; Short=pp-GaNTase 1; AltName: Full=Protein-UDP acetylgalactosaminyltransferase 1; AltName: Full=UDP-GalNAc:polypeptide N-acetylgalactosaminyltransferase 1; Contains: RecName: Full=Polypeptide N-acetylgalactosaminyltransferase 1 soluble form	1145	20	0	62.88	13	C:GO:0000139; F:GO:0004653; F:GO:0005112; P:GO:0008593; P:GO:0009312; C:GO:0016021; P:GO:0016266; P:GO:0018242; P:GO:0018243; F:GO:0030246; C:GO:0031985; P:GO:0032504; F:GO:0046872	C:Golgi membrane; F:polypeptide N-acetylgalactosaminyltransferase activity; F:Notch binding; P:regulation of Notch signaling pathway; P:oligosaccharide biosynthetic process; C:integral component of membrane; P:O-glycan processing; P:protein O-linked glycosylation via serine; P:protein O-linked glycosylation via threonine; F:carbohydrate binding; C:Golgi cisterna; P:multicellular organism reproduc…	EC:2.4.1.41	Polypeptide N-acetylgalactosaminyltransferase	IPR000772 (SMART); IPR029044 (G3DSA:3.90.550.GENE3D); IPR000772 (PFAM); G3DSA:2.80.10.50 (GENE3D); PTHR11675 (PANTHER); PTHR11675:SF110 (PANTHER); IPR000772 (PROSITE_PROFILES); IPR000772 (CDD); IPR029044 (SUPERFAMILY); IPR035992 (SUPERFAMILY)	no GO terms	no GO terms
TRINITY_DN7574_c0_g1_i2	UBN1	UBN1 - Pygocentrus nattereri ubinuclein 1 (ubn1), transcript variant X2, mRNA	4161	20	0	78.36	2	C:GO:0005634; P:GO:0006325	C:nucleus; P:chromatin organization			IPR026947 (PFAM); mobidb-lite (MOBIDB_LITE); mobidb-lite (MOBIDB_LITE); mobidb-lite (MOBIDB_LITE); mobidb-lite (MOBIDB_LITE); mobidb-lite (MOBIDB_LITE); mobidb-lite (MOBIDB_LITE); mobidb-lite (MOBIDB_LITE); IPR026936 (PTHR21669:PANTHER); PTHR21669 (PANTHER); IPR026936 (PTHR21669:PANTHER); PTHR21669 (PANTHER)	C:GO:0005634; P:GO:0006325	C:nucleus; P:chromatin organization
TRINITY_DN76_c1_g1_i2	SLC38A3	UBN1 - Pygocentrus nattereri ubinuclein 1 (ubn1), transcript variant X2, mRNA	4161	20	0	78.36	2	C:GO:0005634; P:GO:0006325	C:nucleus; P:chromatin organization			IPR026947 (PFAM); mobidb-lite (MOBIDB_LITE); mobidb-lite (MOBIDB_LITE); mobidb-lite (MOBIDB_LITE); mobidb-lite (MOBIDB_LITE); mobidb-lite (MOBIDB_LITE); mobidb-lite (MOBIDB_LITE); mobidb-lite (MOBIDB_LITE); IPR026936 (PTHR21669:PANTHER); PTHR21669 (PANTHER); IPR026936 (PTHR21669:PANTHER); PTHR21669 (PANTHER)	C:GO:0005634; P:GO:0006325	C:nucleus; P:chromatin organization
TRINITY_DN80_c0_g1_i1	RTN1	RTN1 - Pygocentrus nattereri reticulon 1 (rtn1), transcript variant X2, mRNA	2453	20	0	82.86	5	F:GO:0003674; C:GO:0005783; C:GO:0005789; P:GO:0008150; C:GO:0016021	F:molecular_function; C:endoplasmic reticulum; C:endoplasmic reticulum membrane; P:biological_process; C:integral component of membrane			IPR003388 (PFAM); PTHR45799:SF5 (PANTHER); PTHR45799 (PANTHER); IPR003388 (PROSITE_PROFILES)	no GO terms	no GO terms
TRINITY_DN8509_c0_g1_i8	MTMR2	MTMR2 - RecName: Full=Myotubularin-related protein 2; AltName: Full=Phosphatidylinositol-3,5-bisphosphate 3-phosphatase; AltName: Full=Phosphatidylinositol-3-phosphate phosphatase	6660	20	0	57.36	33	P:GO:0001558; F:GO:0001691; F:GO:0004438; F:GO:0004725; C:GO:0005774; C:GO:0005789; C:GO:0005829; P:GO:0006470; P:GO:0006661; P:GO:0006914; P:GO:0007283; F:GO:0008138; P:GO:0009966; C:GO:0016021; C:GO:0016604; F:GO:0017112; F:GO:0019902; P:GO:0031329; P:GO:0031645; C:GO:0031901; F:GO:0035091; P:GO:0042552; C:GO:0043005; P:GO:0043086; P:GO:0043087; C:GO:0045202; P:GO:0046856; C:GO:0048471; P:GO:00…	P:regulation of cell growth; F:pseudophosphatase activity; F:phosphatidylinositol-3-phosphatase activity; F:protein tyrosine phosphatase activity; C:vacuolar membrane; C:endoplasmic reticulum membrane; C:cytosol; P:protein dephosphorylation; P:phosphatidylinositol biosynthetic process; P:autophagy; P:spermatogenesis; F:protein tyrosine/serine/threonine phosphatase activity; P:regulation of signal…	EC:3.1.3.16	Protein-serine/threonine phosphatase	IPR004182 (SMART); IPR001849 (SMART); IPR001194 (SMART); IPR005113 (SMART); IPR005112 (SMART); IPR005113 (PFAM); G3DSA:3.40.50.11500 (GENE3D); IPR010569 (PFAM); IPR022096 (PFAM); IPR001849 (PFAM); IPR011993 (G3DSA:2.30.29.GENE3D); IPR001194 (PFAM); G3DSA:3.30.450.200 (GENE3D); IPR004182 (PFAM); mobidb-lite (MOBIDB_LITE); mobidb-lite (MOBIDB_LITE); mobidb-lite (MOBIDB_LITE); IPR030564 (PANTHER); I…	F:GO:0019208; P:GO:0043087	F:phosphatase regulator activity; P:regulation of GTPase activity
TRINITY_DN896_c0_g1_i2	HSDL2	HSDL2 - RecName: Full=Hydroxysteroid dehydrogenase-like protein 2	2195	20	0	65.95	30	F:GO:0000062; F:GO:0003988; C:GO:0005634; C:GO:0005782; C:GO:0005783; C:GO:0005829; P:GO:0007568; F:GO:0008526; F:GO:0015485; P:GO:0015914; F:GO:0016491; C:GO:0031315; C:GO:0031410; P:GO:0032355; P:GO:0032385; C:GO:0032991; P:GO:0034699; F:GO:0042802; P:GO:0043065; F:GO:0044877; P:GO:0045542; F:GO:0050632; P:GO:0055114; F:GO:0070538; P:GO:0071397; P:GO:0072659; F:GO:0120019; F:GO:0120020; P:GO:19…	F:fatty-acyl-CoA binding; F:acetyl-CoA C-acyltransferase activity; C:nucleus; C:peroxisomal matrix; C:endoplasmic reticulum; C:cytosol; P:aging; F:phosphatidylinositol transfer activity; F:cholesterol binding; P:phospholipid transport; F:oxidoreductase activity; C:extrinsic component of mitochondrial outer membrane; C:cytoplasmic vesicle; P:response to estradiol; P:positive regulation of intracel…	EC:2.3.1.176; EC:2.3.1.16	Propanoyl-CoA C-acyltransferase; Acetyl-CoA C-acyltransferase	IPR002347 (PRINTS); G3DSA:3.40.50.720 (GENE3D); IPR003033 (PFAM); IPR036527 (G3DSA:3.30.1050.GENE3D); IPR002347 (PFAM); PTHR42808 (PANTHER); PTHR42808:SF3 (PANTHER); cd09762 (CDD); IPR036291 (SUPERFAMILY); IPR036527 (SUPERFAMILY)	no GO terms	no GO terms
TRINITY_DN9116_c0_g1_i1	Cacna1a	Cacna1a - Pygocentrus nattereri voltage-dependent P/Q-type calcium channel subunit alpha-1A-like (LOC108414624), transcript variant X8, mRNA	3269	20	0	84.89	9	P:GO:0001966; F:GO:0005509; C:GO:0005891; P:GO:0007274; F:GO:0008331; P:GO:0034765; P:GO:0036269; P:GO:0070509; P:GO:0070588	P:thigmotaxis; F:calcium ion binding; C:voltage-gated calcium channel complex; P:neuromuscular synaptic transmission; F:high voltage-gated calcium channel activity; P:regulation of ion transmembrane transport; P:swimming behavior; P:calcium ion import; P:calcium ion transmembrane transport			mobidb-lite (MOBIDB_LITE)	no GO terms	no GO terms
